# Supplementary material for: An efficient cascade synthesis of various 2H-1,4-benzoxazin-3-(4H)-ones from o-halophenols and 2-halo-amides catalyzed by CuI
Source: Royal Society of Chemistry journal article supplement (doi:10.1039/b906210f), 2009-01-01
Supplement: b906210f.pdf [file b906210f.pdf]

# Supporting Information

## An Efficient Cascade Synthesis of Various *2H*-1,4-benzoxazin-3-(*4H*)-ones from *o*-Halophenols and 2-Halo-amides Catalyzed by CuI

Dingben Chen,<sup>a,b</sup> Guodong Shen,<sup>a</sup> Weiliang Bao<sup>\*a</sup>

<sup>a</sup> Department of Chemistry, Zhejiang University, Xi Xi Campus, Hangzhou 310028, Zhejiang, P. R. China.

<sup>b</sup> College of Pharmaceutical and Chemical Engineering, Taizhou University, Linhai 317000, Zhejiang, P. R. China.

E-mail: [wlbao@css.zju.edu.cn](mailto:wlbao@css.zju.edu.cn)

### General Remarks.

All reagents and solvents were pure analytical grade materials purchased from commercial sources and were used without further purification, if not stated otherwise. 4-Substituted-*o*-iodophenols and *N*-substituted 2-halo amides were prepared according to the known literatures.<sup>1a-c</sup> All melting points are uncorrected. The NMR spectra were recorded in CDCl<sub>3</sub> on a 400 M Hz instrument with TMS as internal standard. TLC was carried out with 0.2 mm thick silica gel plates (GF254). Visualization was accomplished by UV light. The columns were hand packed with silica gel 60 (200-300). All reactions were carried out in an oven-dried Schlenk tube equipped with a magnetic stir bar under N<sub>2</sub> atmosphere. Unknown compound was additionally confirmed by <sup>13</sup>C NMR and Elemental analysis. Mass spectra were obtained using EI ionization. IR spectrum were taken in ATR apparatus.

### General procedure

#### General Procedure for the synthesis of *2H*-1,4-benzoxazin-3-(*4H*)-ones

An oven-dried Schlenk tube equipped with a Teflon valve was charged with a magnetic stir bar, CuI (10 mg, 0.05 mmol, 10 mol%), Cs<sub>2</sub>CO<sub>3</sub> (359 mg, 1.1 mmol),

2-halophenol **1** (0.60 mmol), 2-halo amides **2** (0.50 mmol), 1,10-phenanthroline (20 mg, 0.10 mmol, 20 mol%). The tube was evacuated and backfilled with N<sub>2</sub> (this procedure was repeated 3 times). Under a counter flow of N<sub>2</sub>, dioxane (2.0 mL) was added by syringe and the mixture was stirred for about 24 h at 90°C. The reaction mixture was cooled to room temperature, Ethyl acetate (20 mL) were added, and the resulting suspension was filtered. The filtrate was concentrated, and the residue was purified by column chromatography on silica gel (PE-EtOAc=10:1~2:1, v/v) to provide the desired product **3**.

### Spectroscopic and Analytical Data

#### ***N*-t-Butyl-2-(2-iodophenoxy)acetamide (4)**

A white solid; Mp 50-52°C; IR (neat)  $\nu_{\max}/\text{cm}^{-1}$  3412.1, 3079.5, 2969.2, 1677.5, 1525.0, 1472.7, 1247.1, 1060.8  $\text{cm}^{-1}$ . <sup>1</sup>H NMR (400M Hz, CDCl<sub>3</sub>/TMS):  $\delta$  7.78 (dd,  $J=7.6, 1.2$  Hz, 1H), 7.35-7.28 (m, 1H), 6.96 (s, 1H), 6.81-6.75 (m, 2H), 4.40 (s, 2H), 1.45 (s, 9H) ppm. <sup>13</sup>C NMR (100M Hz, CDCl<sub>3</sub>/TMS): 166.2, 155.5, 139.2, 129.8, 123.6, 112.2, 86.1, 67.9, 51.3, 28.8 ppm. MS (EI)  $m/z$  333 (M<sup>+</sup>). Anal. Calcd for C<sub>12</sub>H<sub>16</sub>INO<sub>2</sub>: C, 43.26; H, 4.84; N, 4.20; Found: C, 43.54; H, 4.71; N, 4.11.

#### ***N*-p-tolyl-2-(2-iodophenoxy)acetamide (5)**

A white solid; Mp 152-154°C; IR (neat)  $\nu_{\max}/\text{cm}^{-1}$  3378.7, 3054.8, 2917.9, 1688.3, 1536.5, 1474.9, 1249.9, 1060.3  $\text{cm}^{-1}$ . <sup>1</sup>H NMR (400M Hz, CDCl<sub>3</sub>/TMS):  $\delta$  8.77 (s, 1H), 7.81 (dd,  $J=8.0, 1.2$  Hz, 1H), 7.55 (d,  $J=8.4$  Hz, 2H), 7.38-7.33 (m, 1H), 7.16 (d,  $J=8.0$  Hz, 2H), 6.84-6.81 (m, 2H), 4.61 (s, 2H), 2.33 (s, 3H) ppm. <sup>13</sup>C NMR (100M Hz, CDCl<sub>3</sub>/TMS): 164.9, 155.4, 139.4, 134.5, 134.4, 130.0, 129.6, 124.0, 119.8, 112.5, 86.4, 67.9, 20.9 ppm. MS (EI)  $m/z$  367 (M<sup>+</sup>). Anal. Calcd for C<sub>15</sub>H<sub>14</sub>INO<sub>2</sub>: C, 49.07; H, 3.84; N, 3.81; Found: C, 49.18; H, 3.92; N, 3.85.

### Copies of <sup>1</sup>H NMR, <sup>13</sup>C NMR and IR Spectrum of Compound

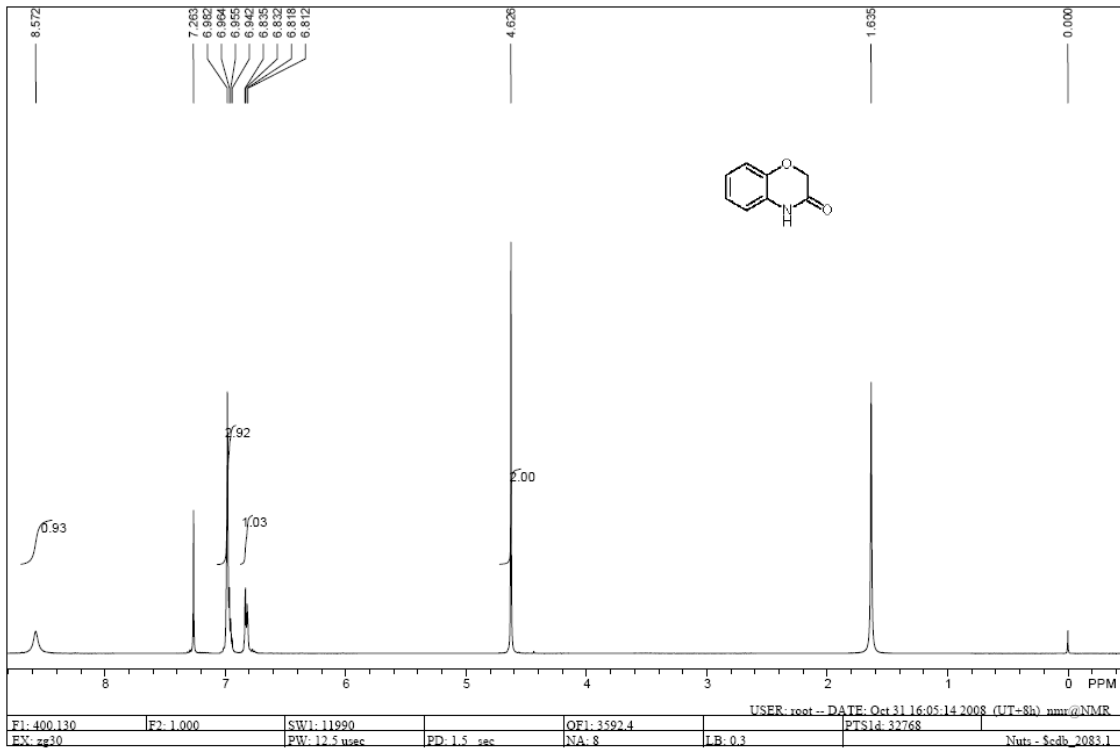

<sup>1</sup>H NMR Spectrum of Compound 3a

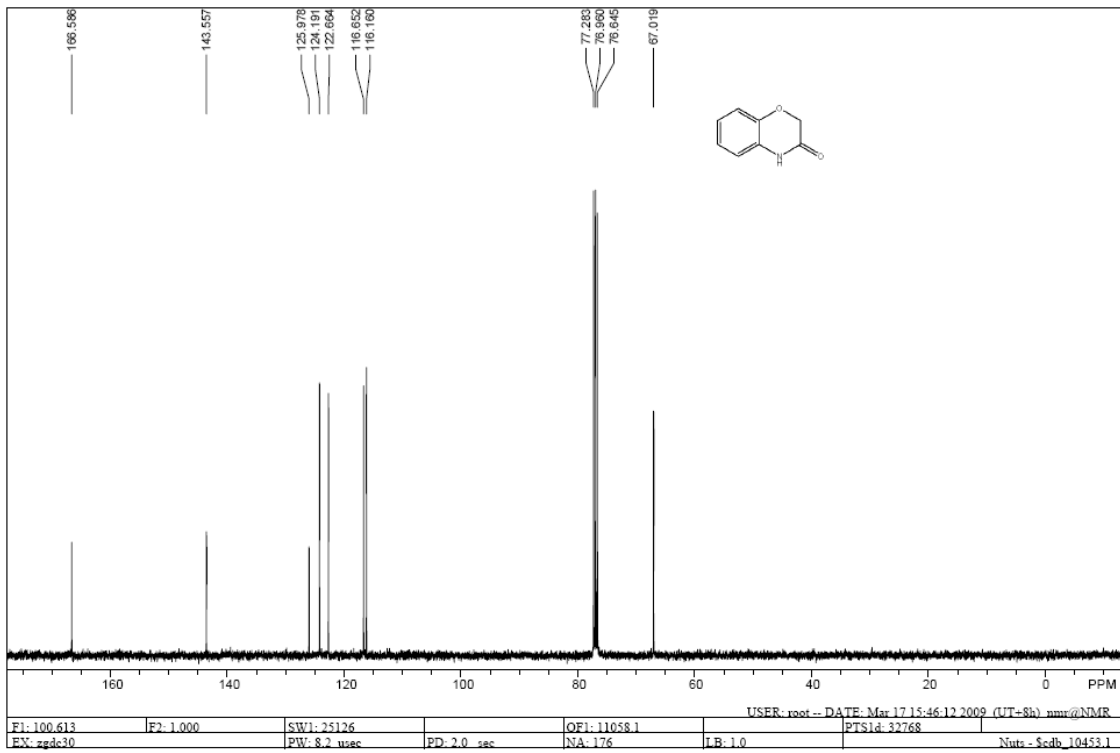

<sup>13</sup>C NMR Spectrum of Compound 3a

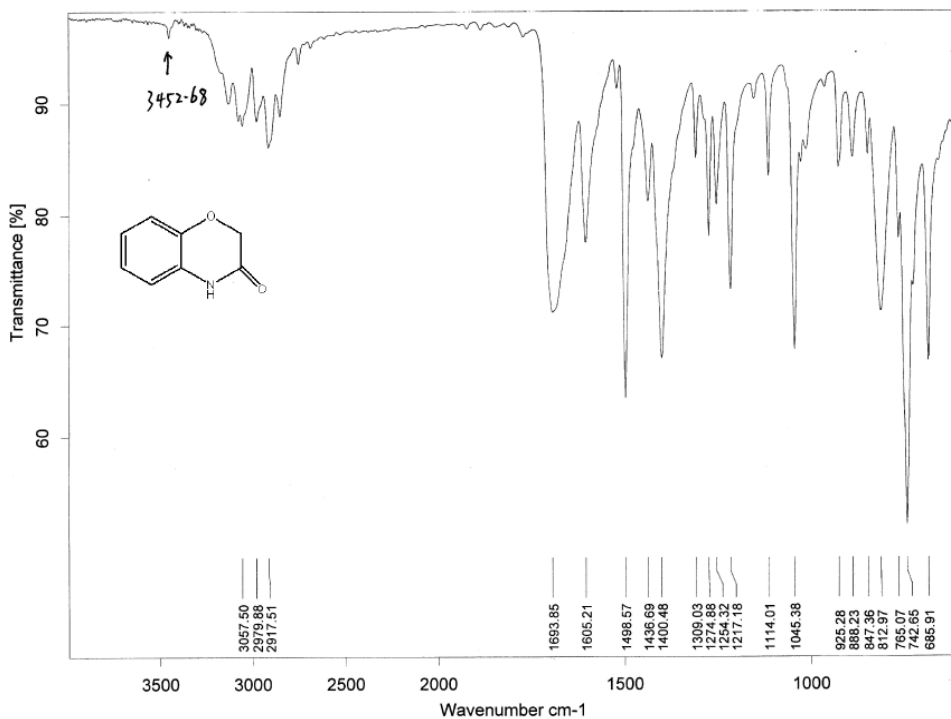

IR Spectrum of Compound 3a

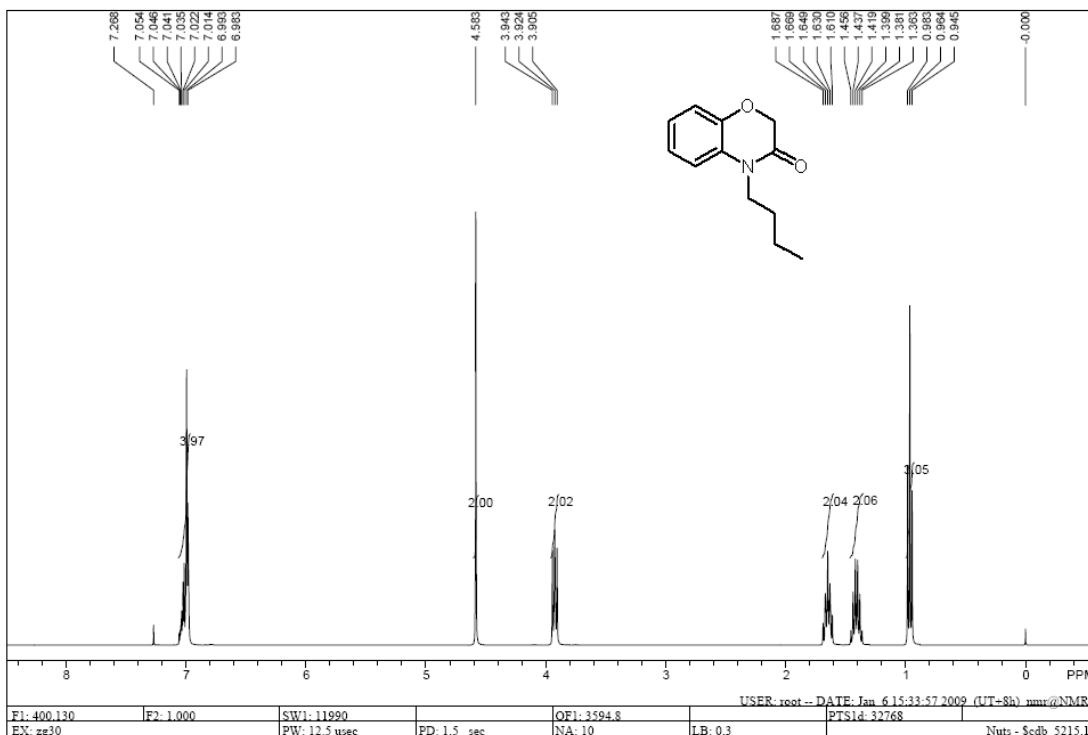

<sup>1</sup>H NMR Spectrum of Compound 3b

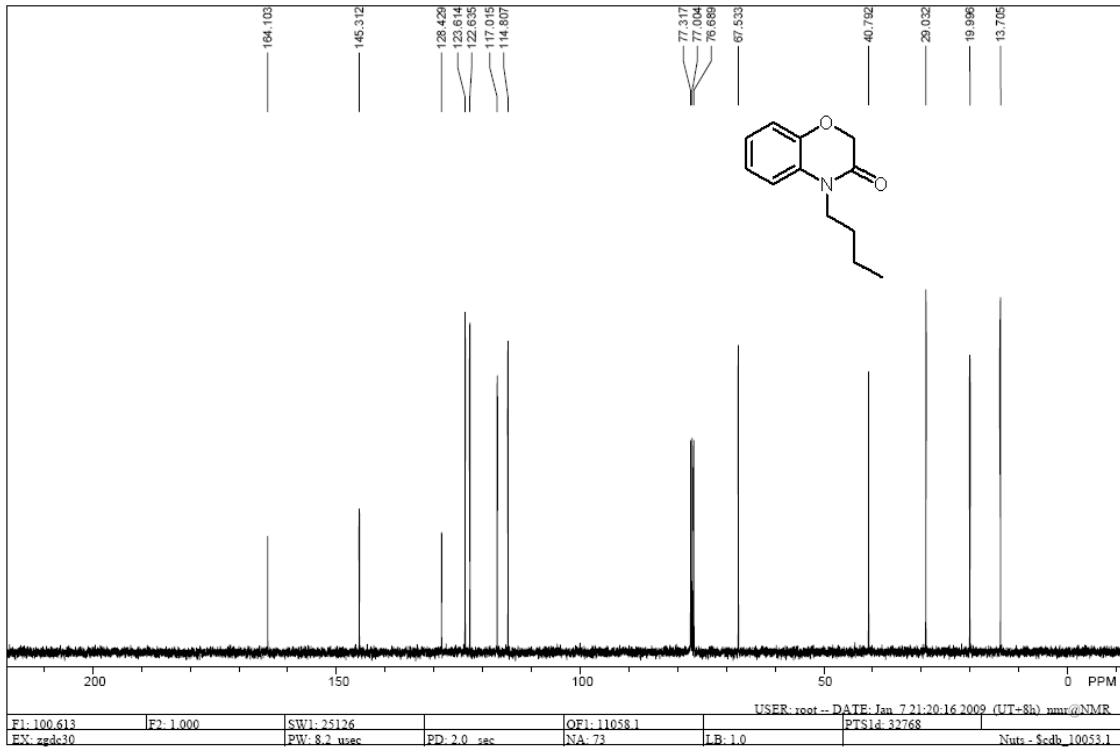

<sup>13</sup>C NMR Spectrum of Compound 3b

D:\OPUSMEASL2179 3b

2009-6-15 10:37:11

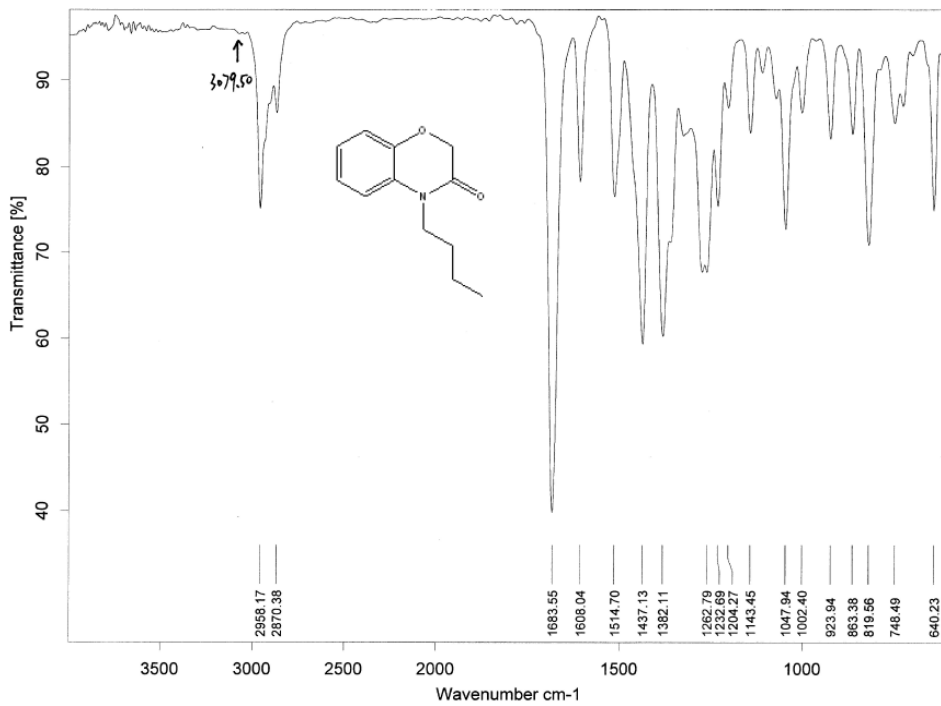

IR Spectrum of Compound 3b

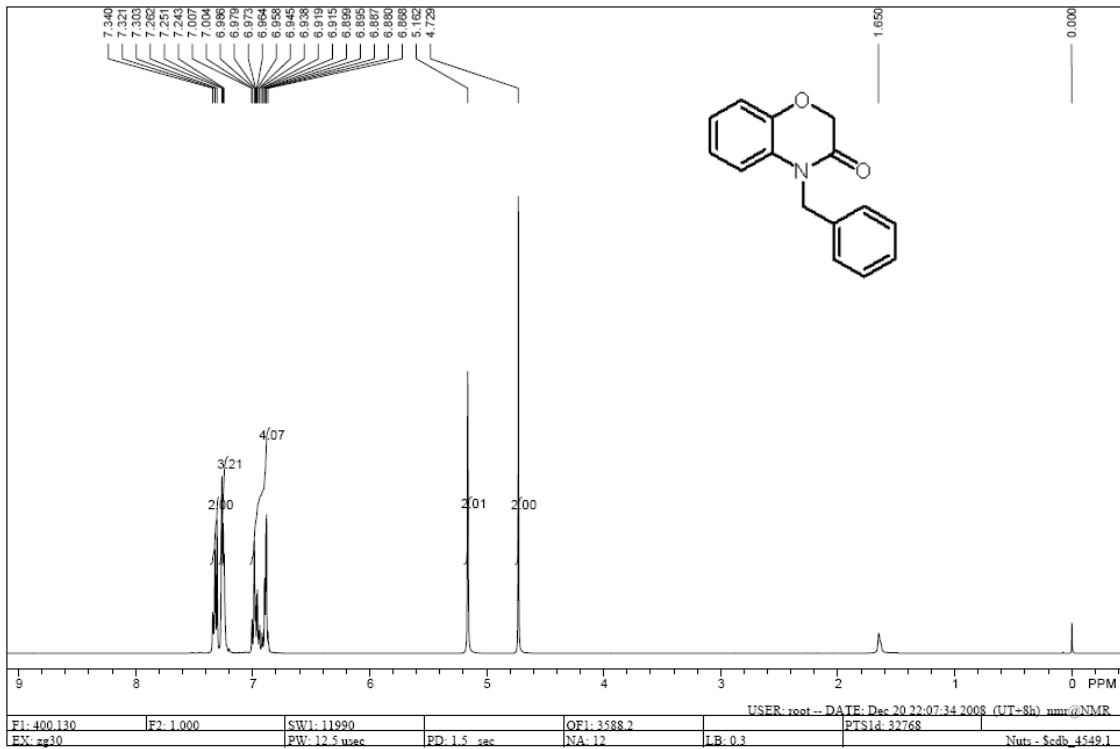

<sup>1</sup>H NMR Spectrum of Compound 3c

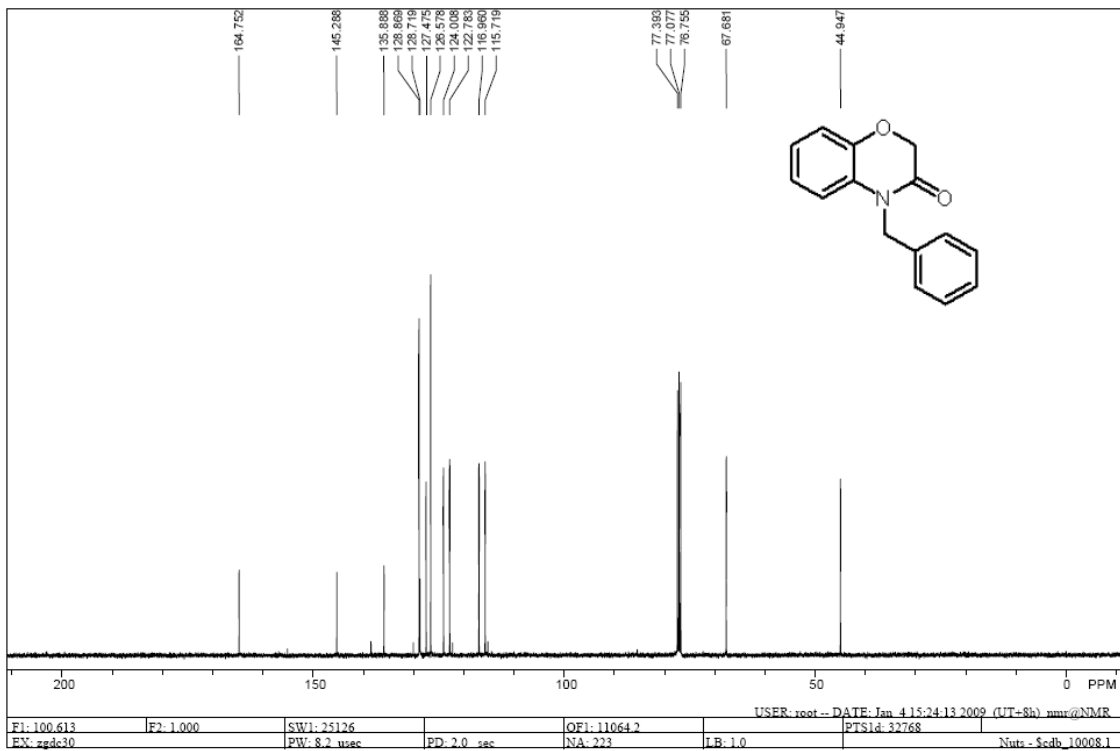

<sup>13</sup>C NMR Spectrum of Compound 3c

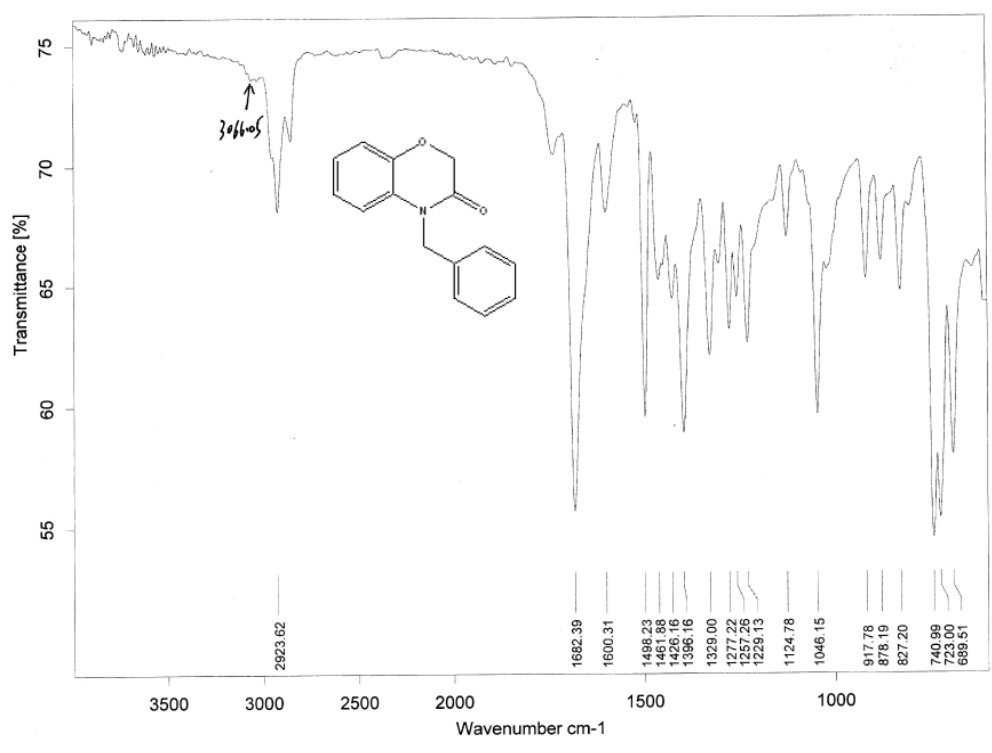

IR Spectrum of Compound 3c

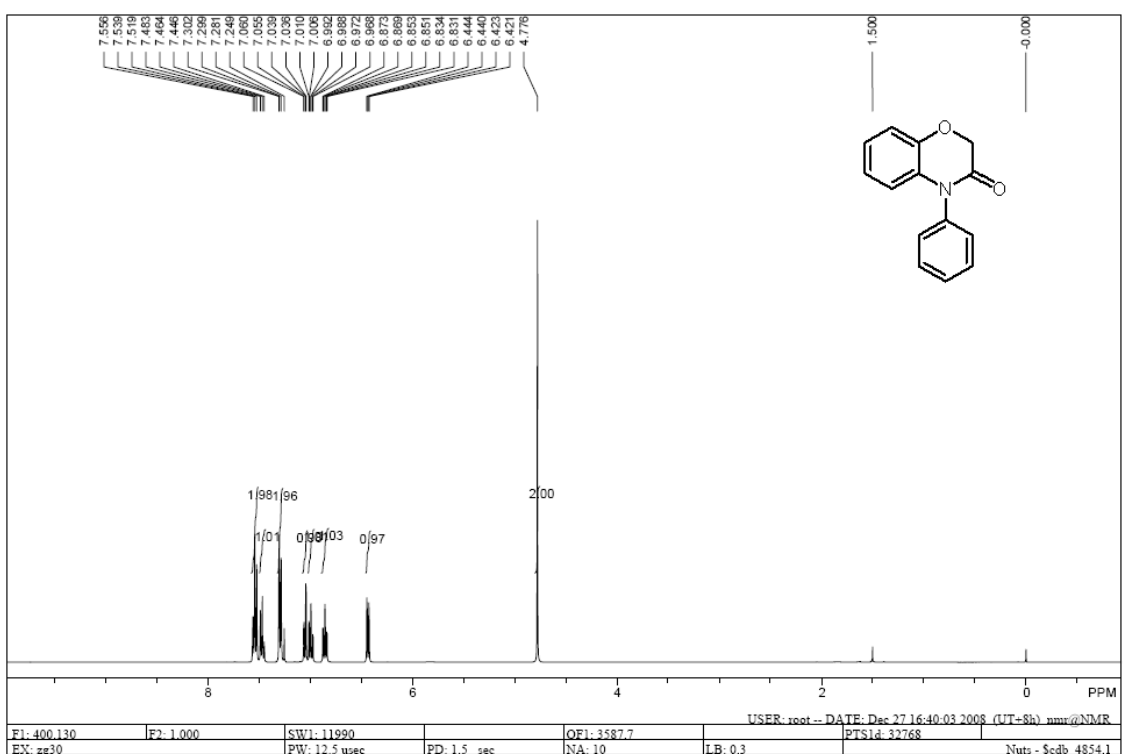

<sup>1</sup>H NMR Spectrum of Compound 3d

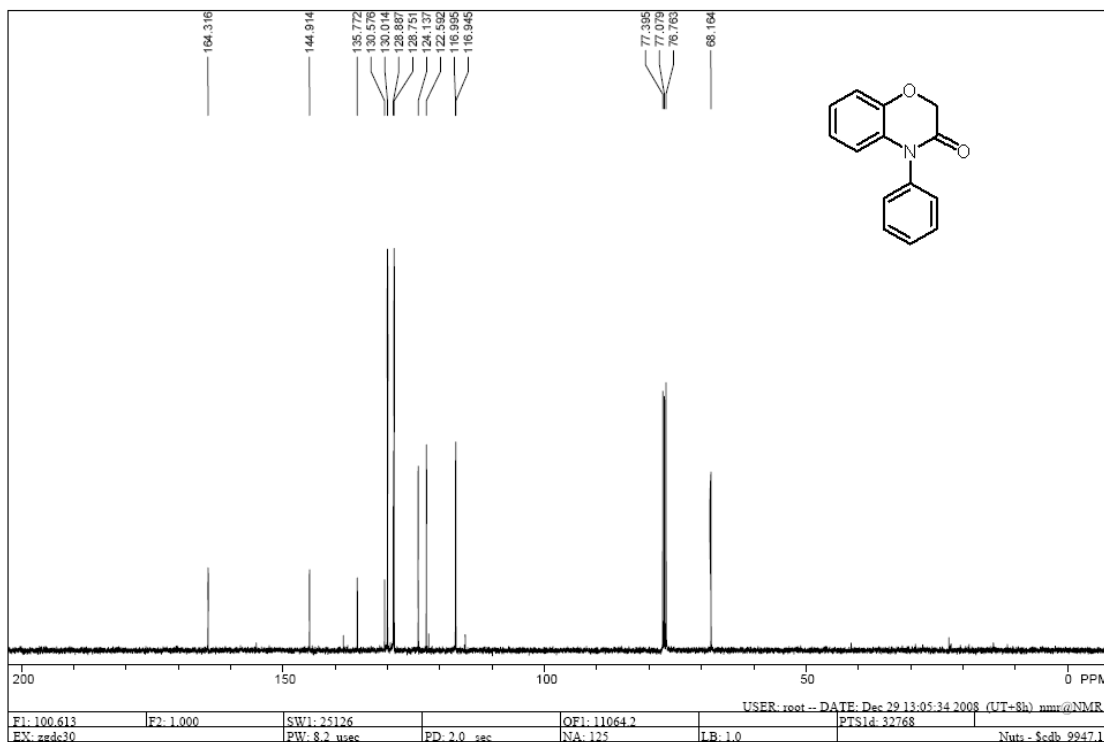

**<sup>13</sup>C NMR Spectrum of Compound 3d**

D:\OPUS\MEAS\2163

3d

2009-6-15 9:40:06

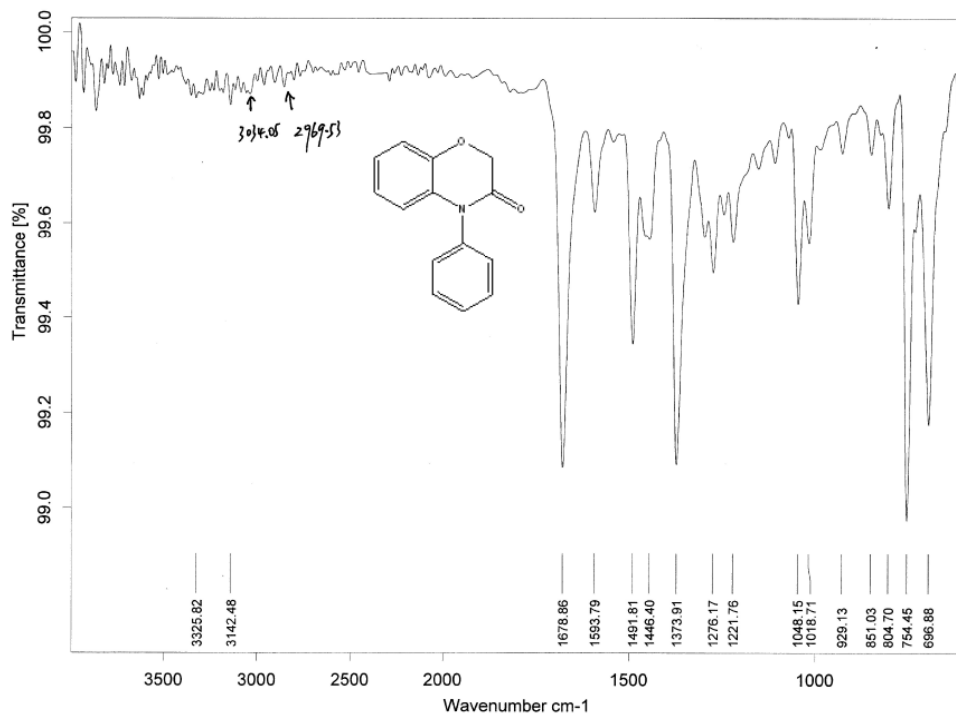

**IR Spectrum of Compound 3d**



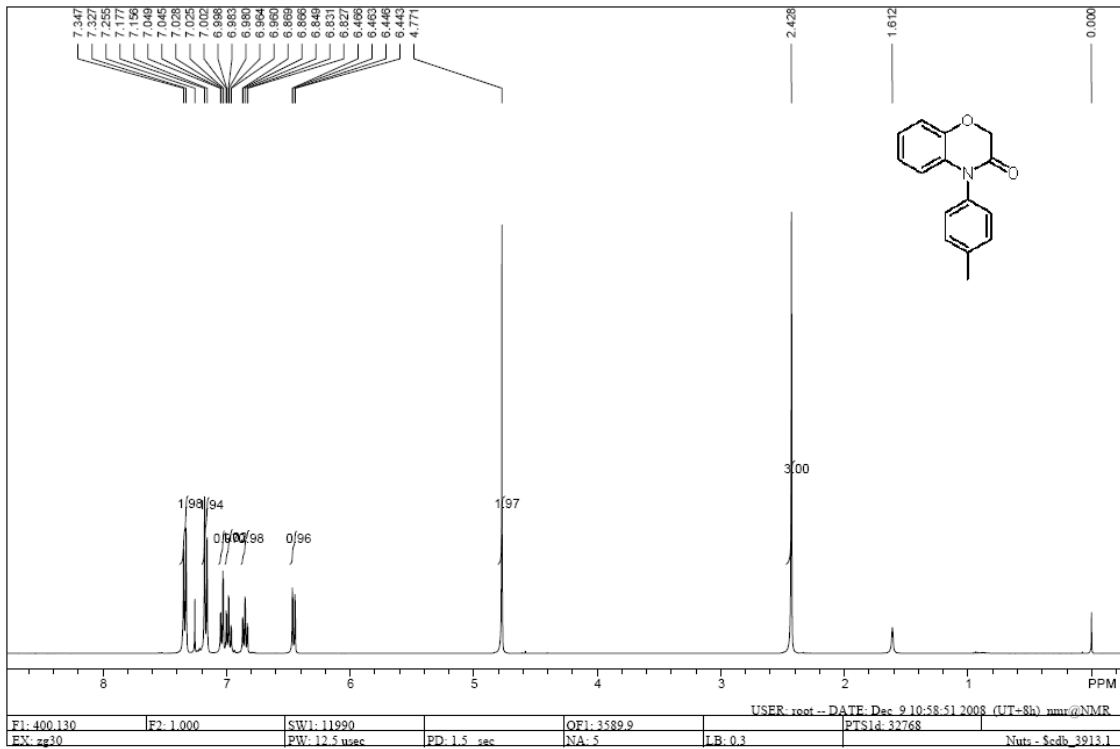

<sup>1</sup>H NMR Spectrum of Compound 3e

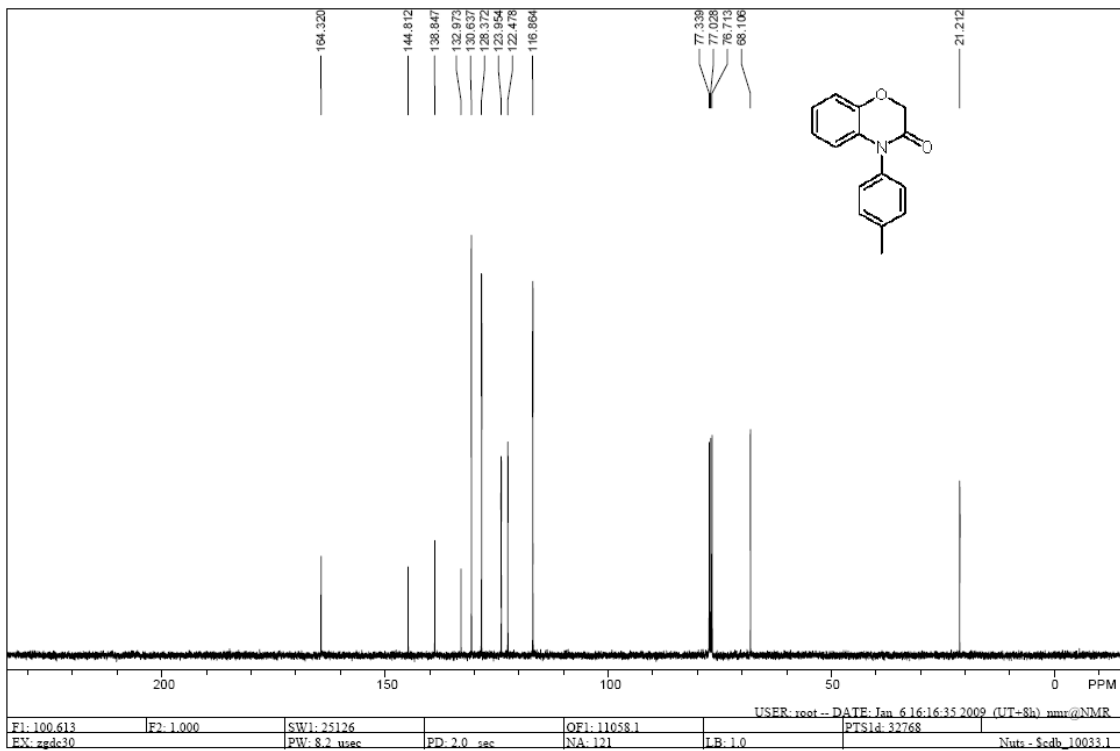

<sup>13</sup>C NMR Spectrum of Compound 3e

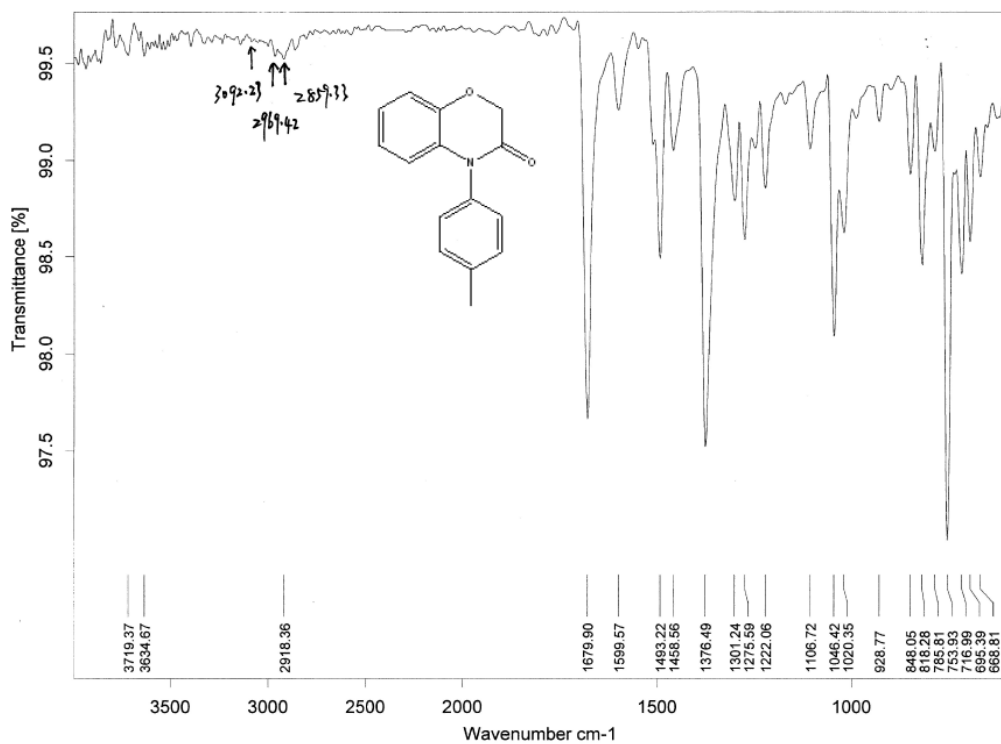

## IR Spectrum of Compound 3e

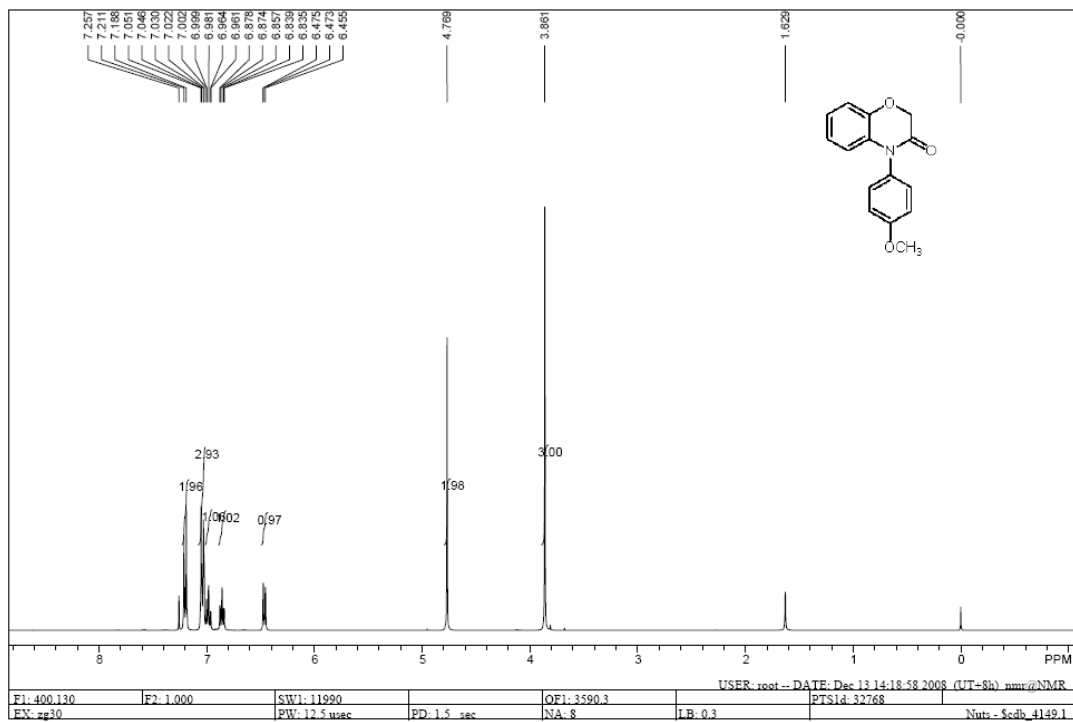<sup>1</sup>H NMR Spectrum of Compound 3f

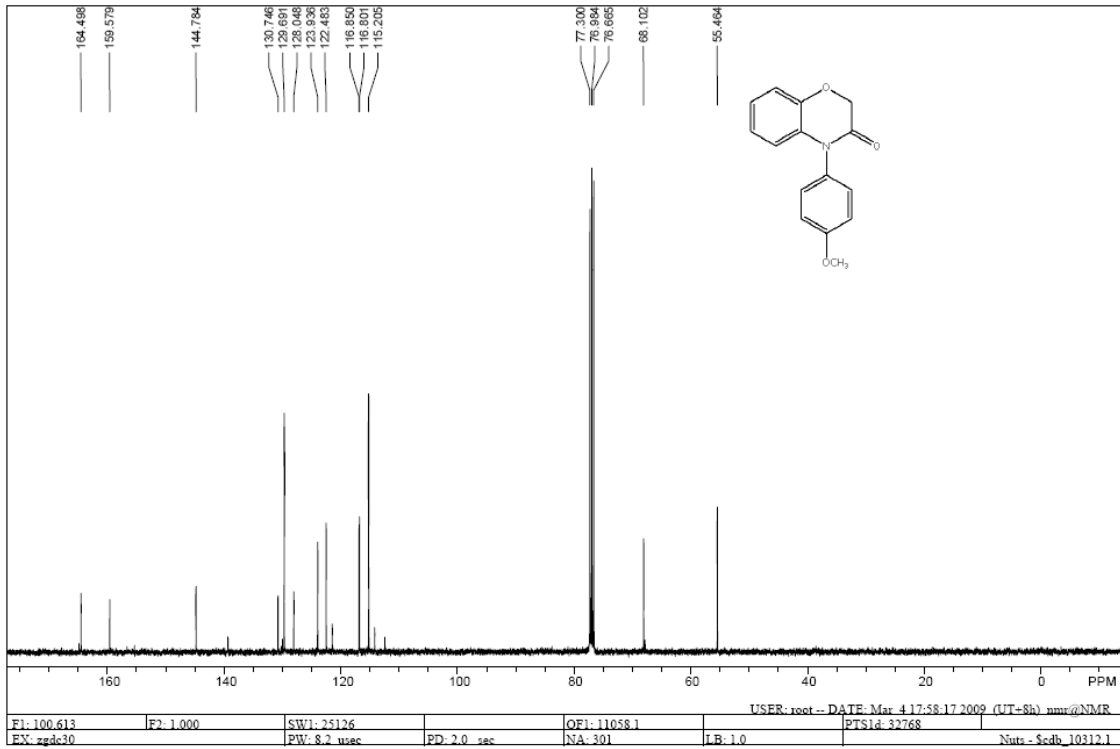

<sup>13</sup>C NMR Spectrum of Compound 3f

D:\OPUS\MEAS1.2165 3f

2009-6-15 9:45:58

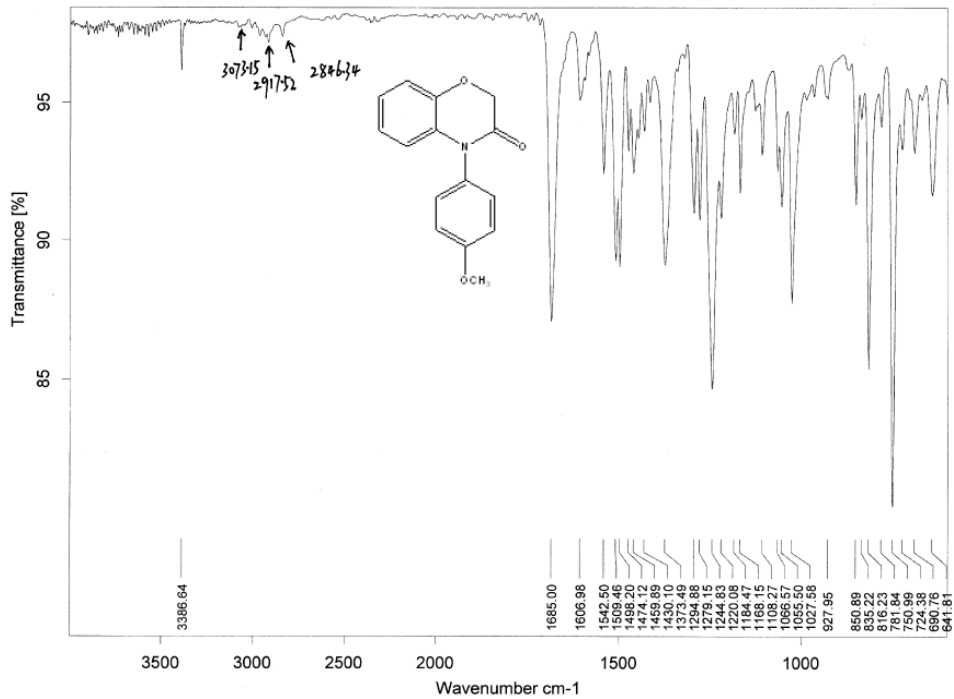

IR Spectrum of Compound 3f

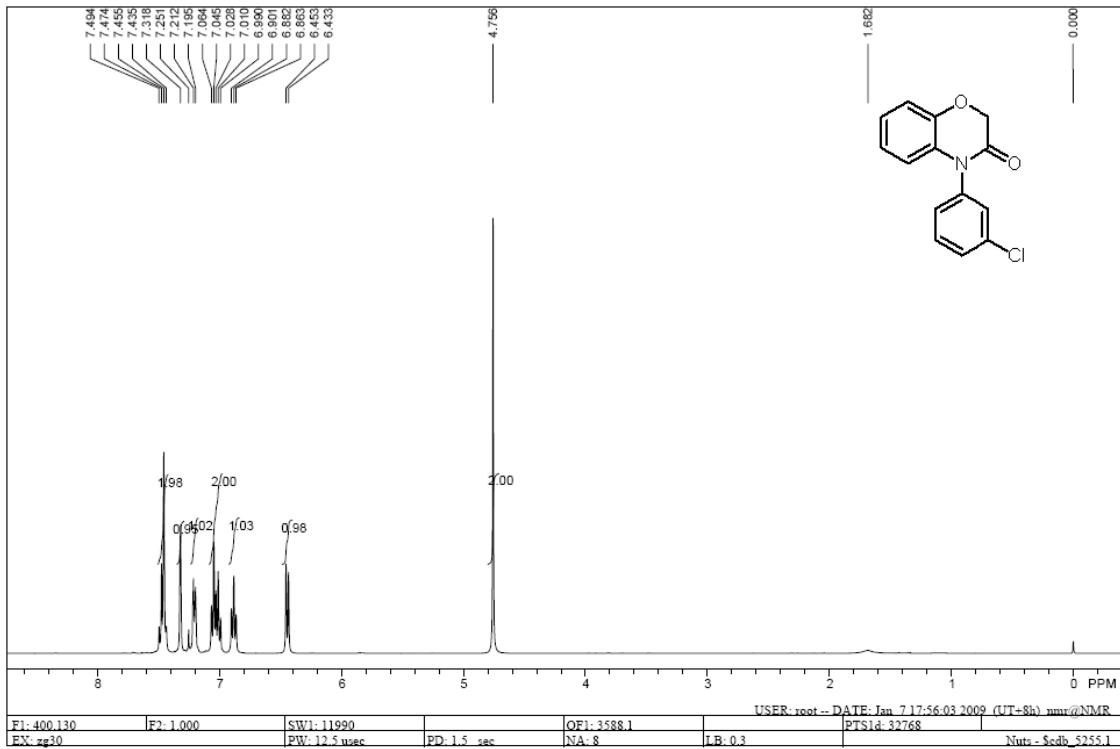

<sup>1</sup>H NMR Spectrum of Compound 3g

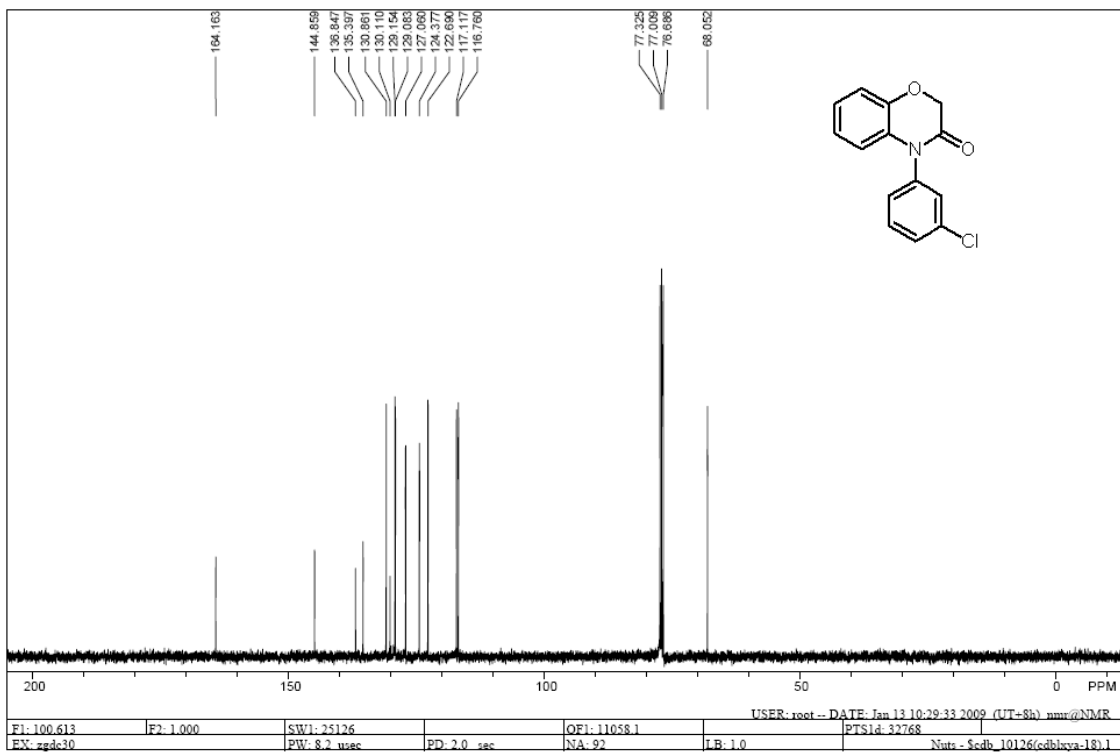

<sup>13</sup>C NMR Spectrum of Compound 3g

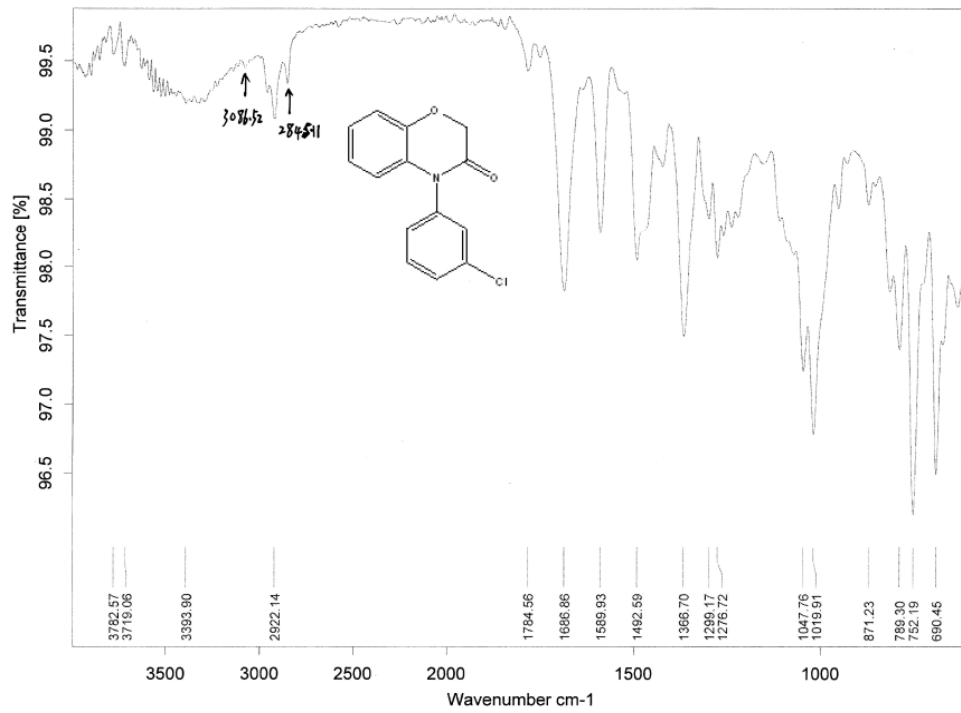

IR Spectrum of Compound 3g

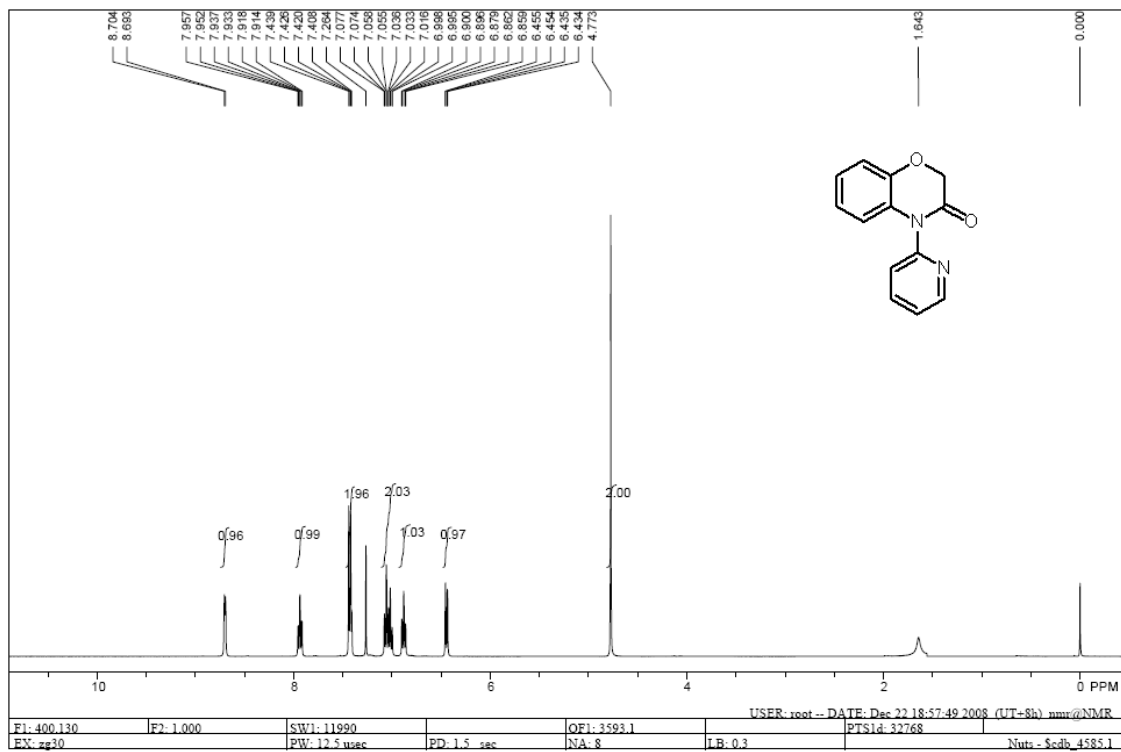<sup>1</sup>H NMR Spectrum of Compound 3h

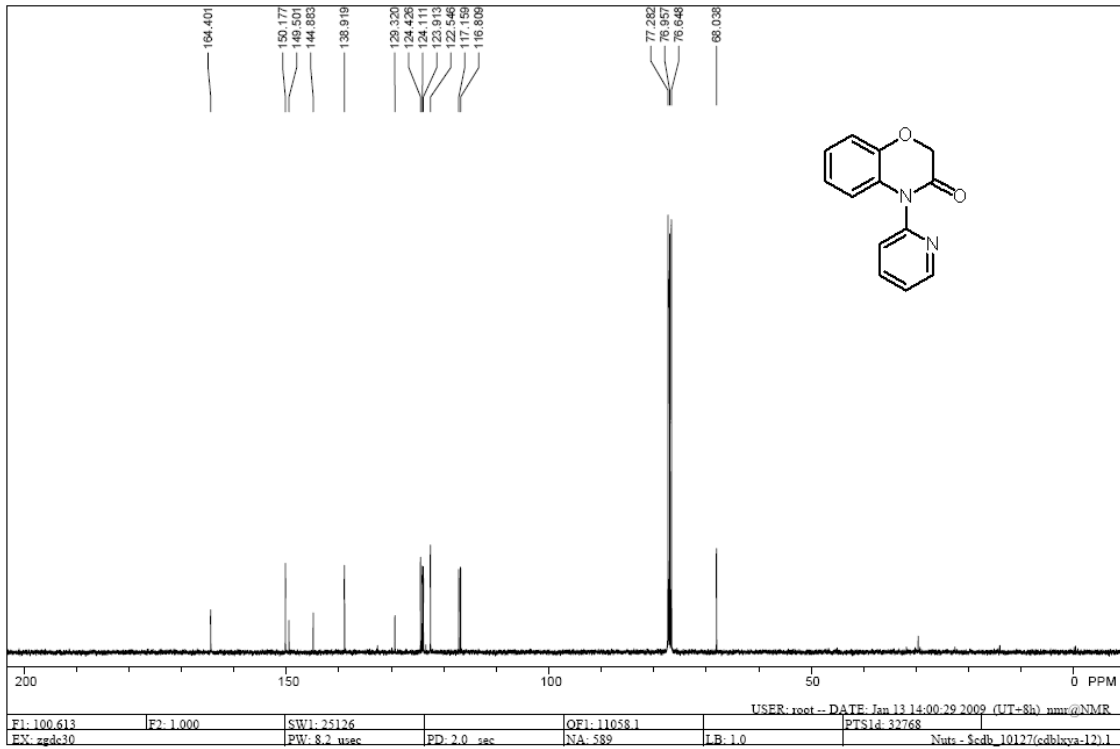

<sup>13</sup>C NMR Spectrum of Compound 3h

D:\OPUS\MEAS\2168

3h.

2009-6-15 9:57:00

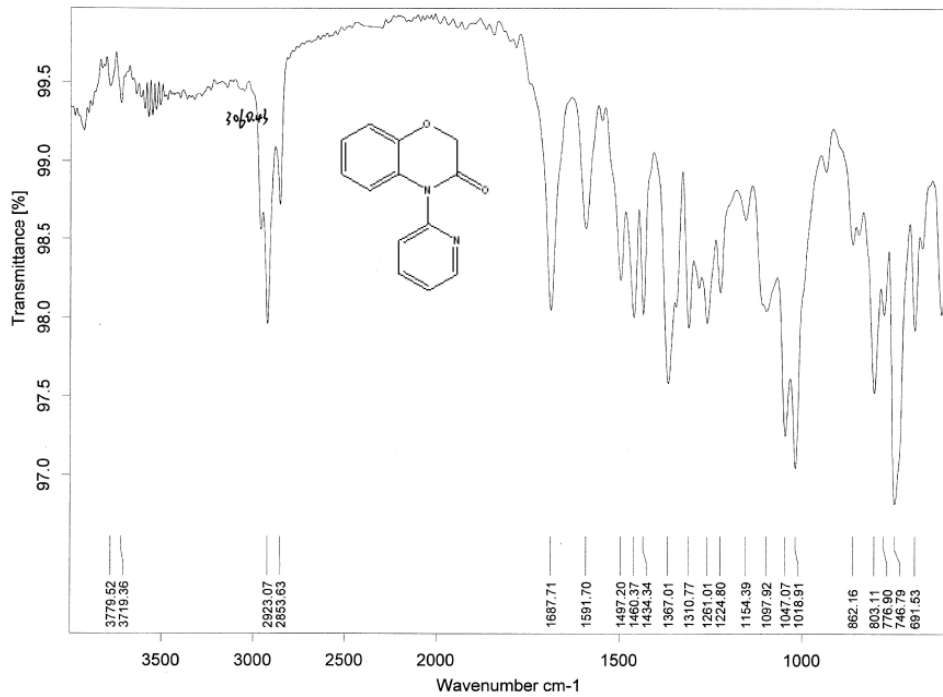

IR Spectrum of Compound 3h

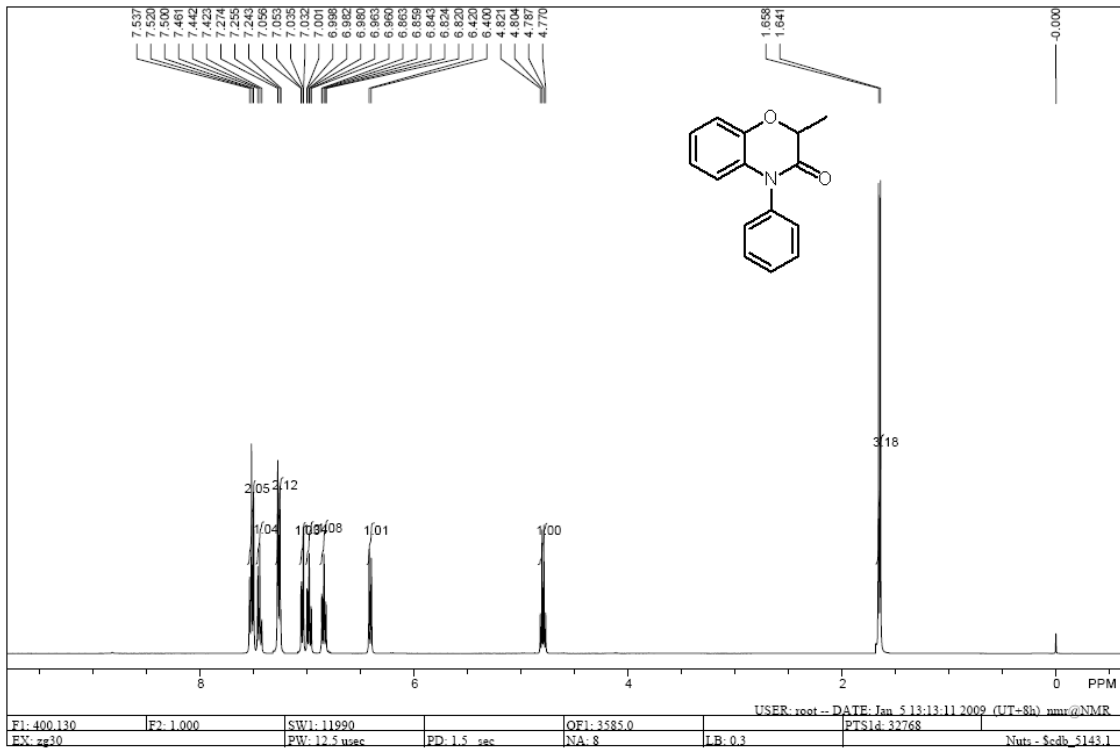

**<sup>1</sup>H NMR Spectrum of Compound 3i**

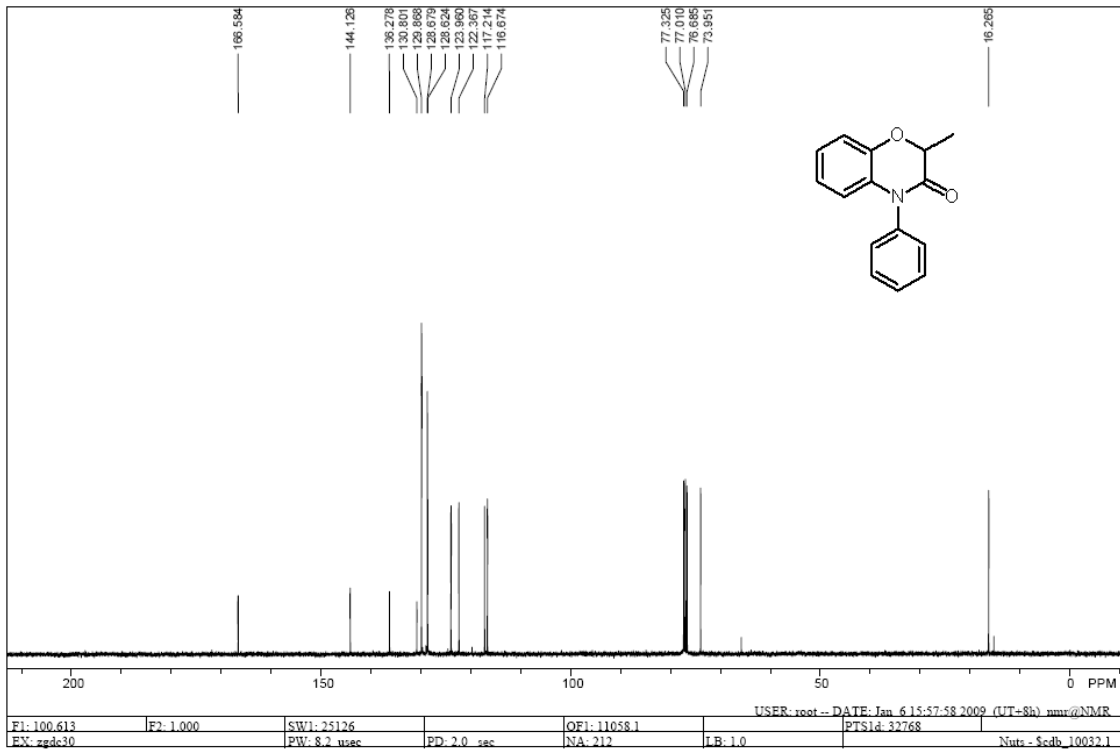

**<sup>13</sup>C NMR Spectrum of Compound 3i**

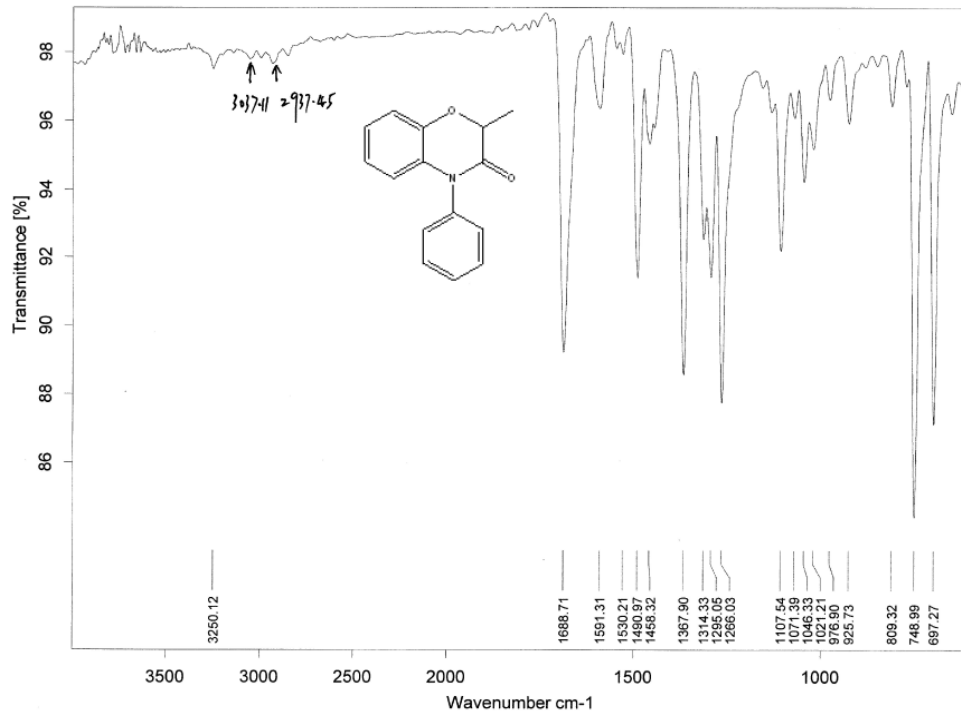

IR Spectrum of Compound 3i

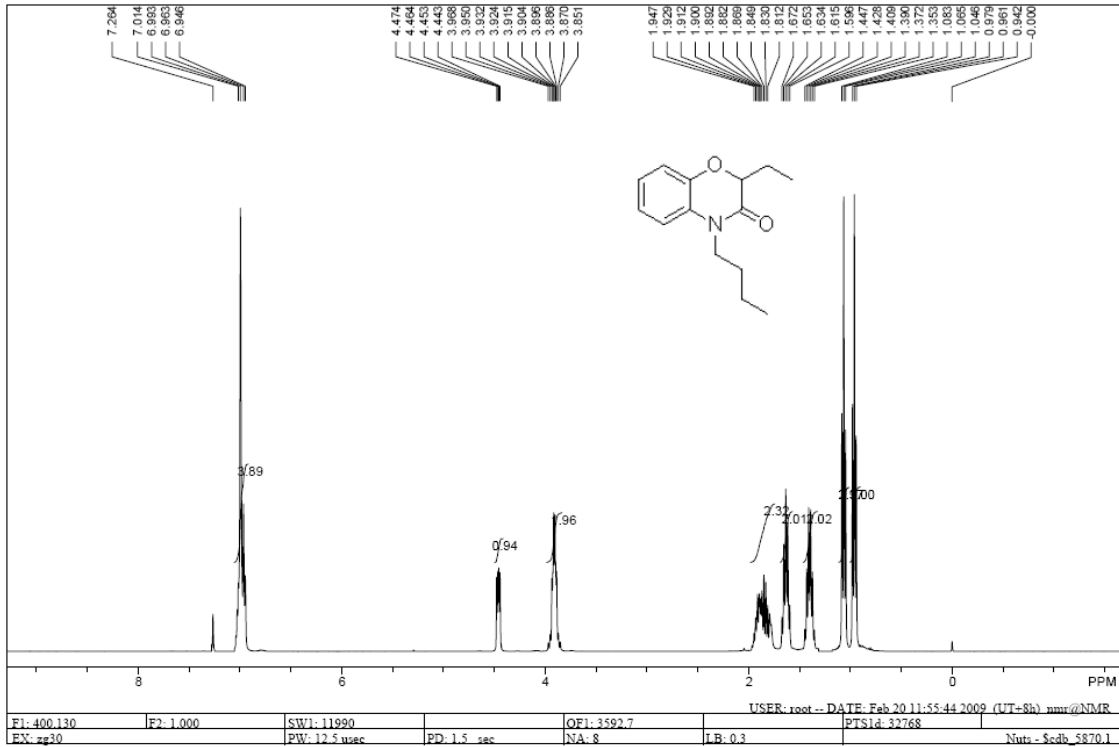

<sup>1</sup>H NMR Spectrum of Compound 3j



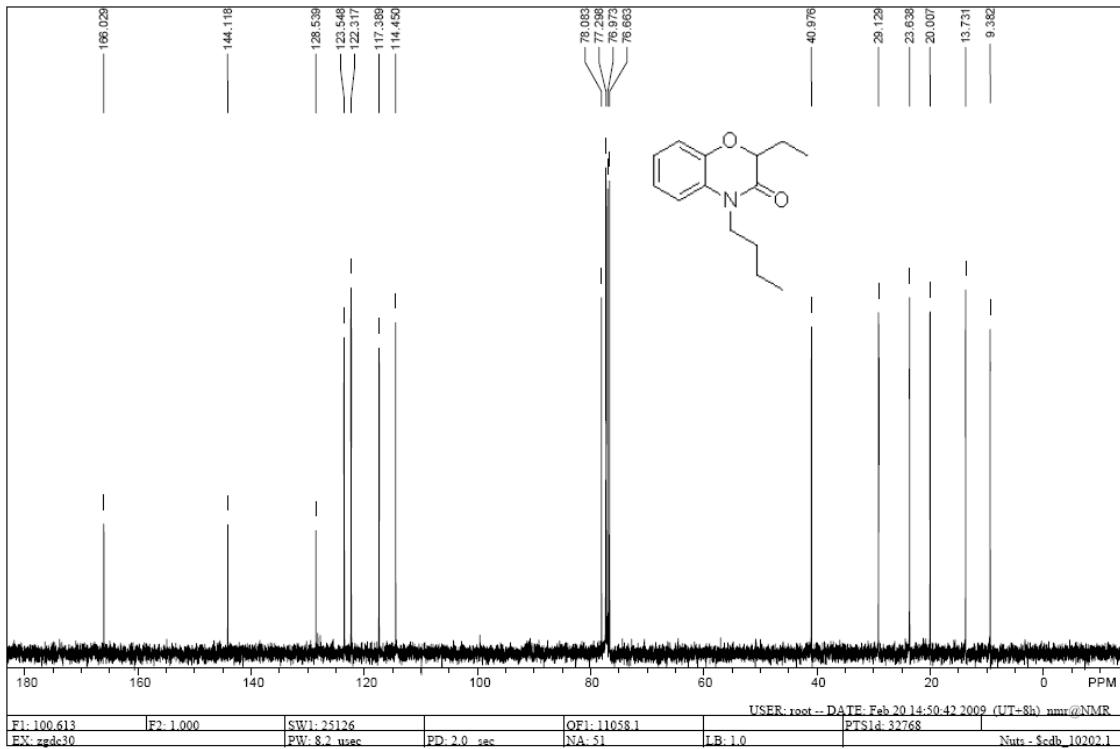

<sup>13</sup>C NMR Spectrum of Compound 3j

D:\OPUS\MEAS1.2180 }j

2009-6-15 10:39:18

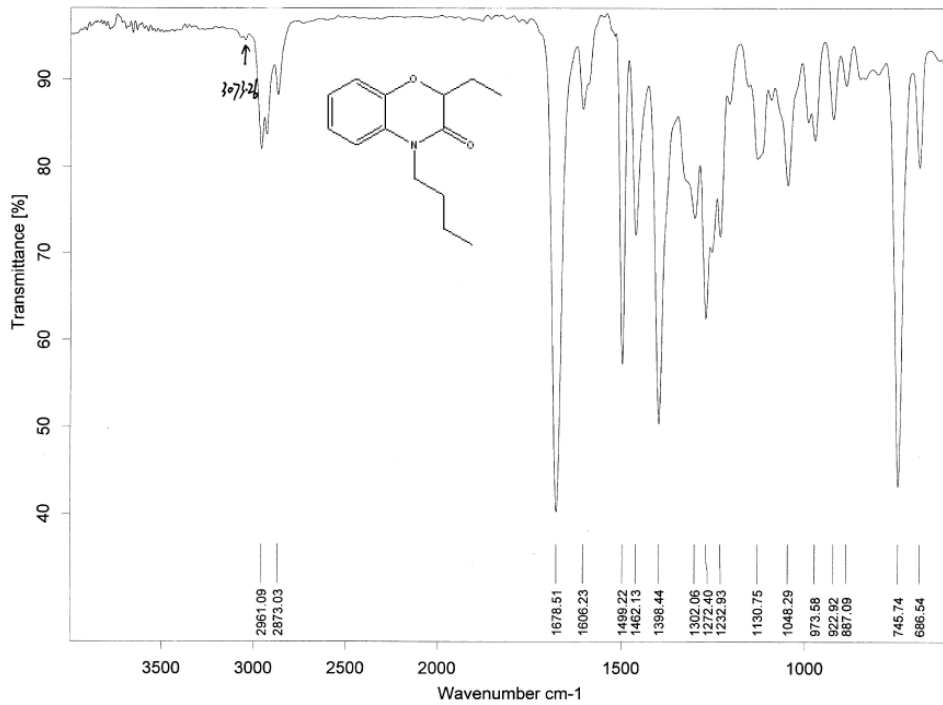

IR Spectrum of Compound 3j

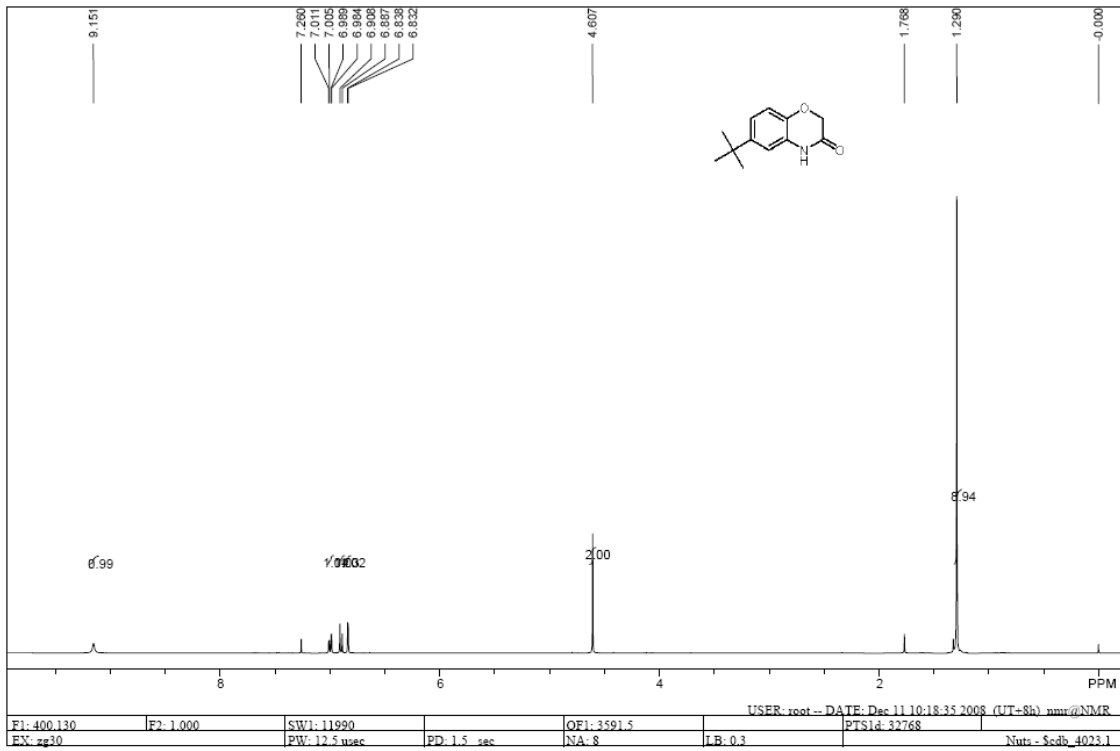

**<sup>1</sup>H NMR Spectrum of Compound 3k**

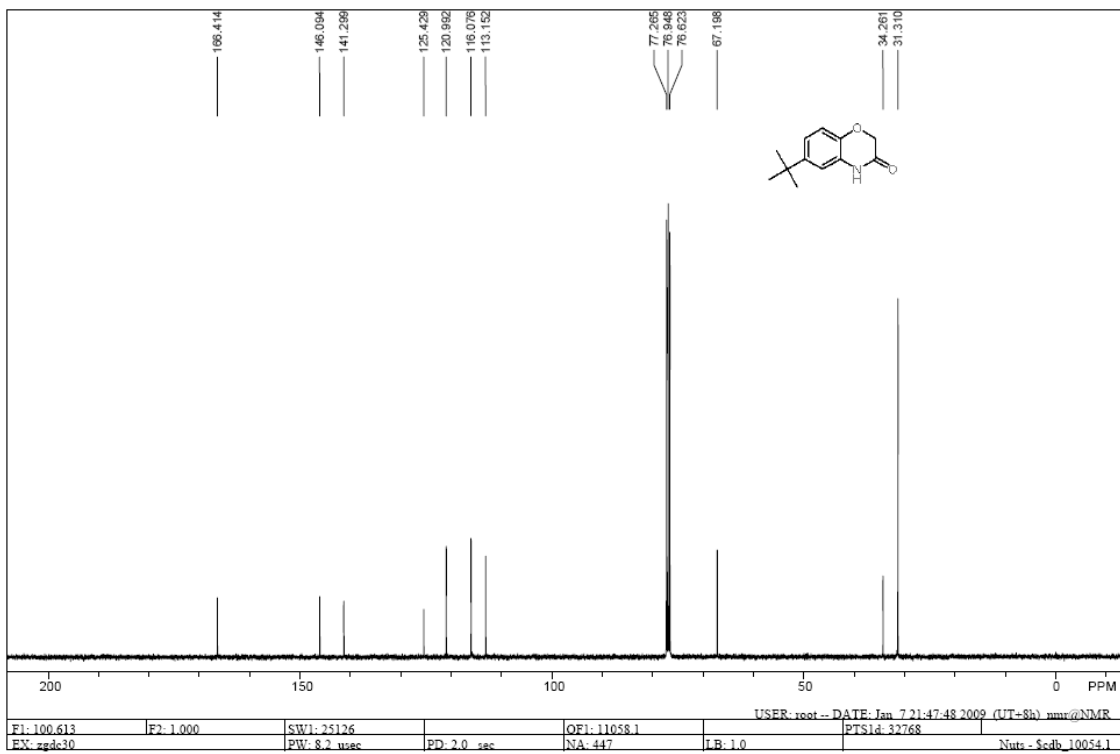

**<sup>13</sup>C NMR Spectrum of Compound 3k**

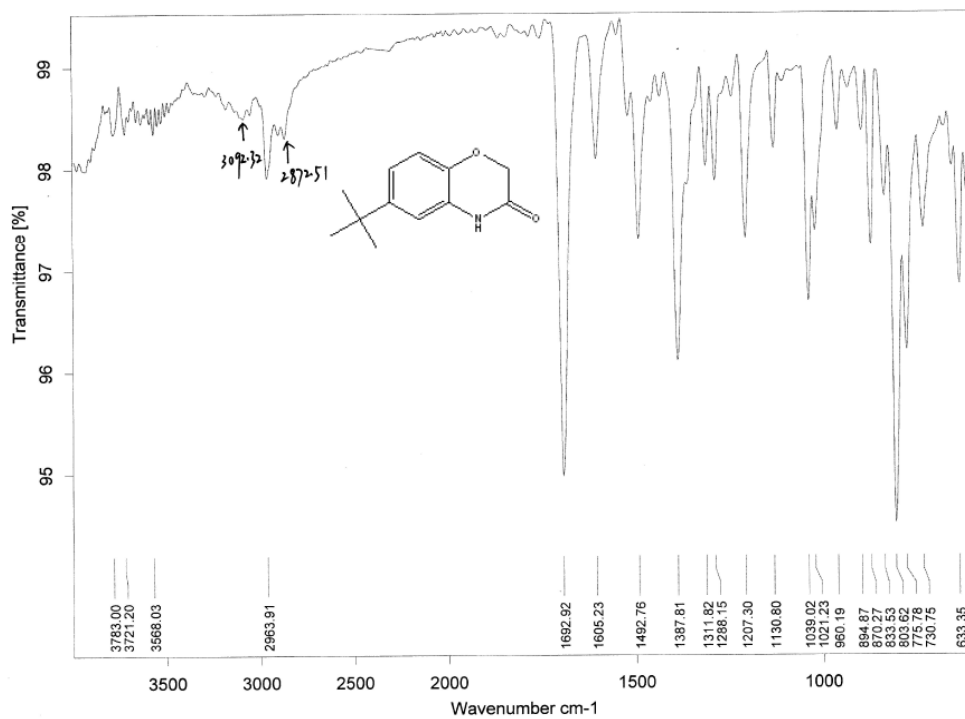

IR Spectrum of Compound 3k

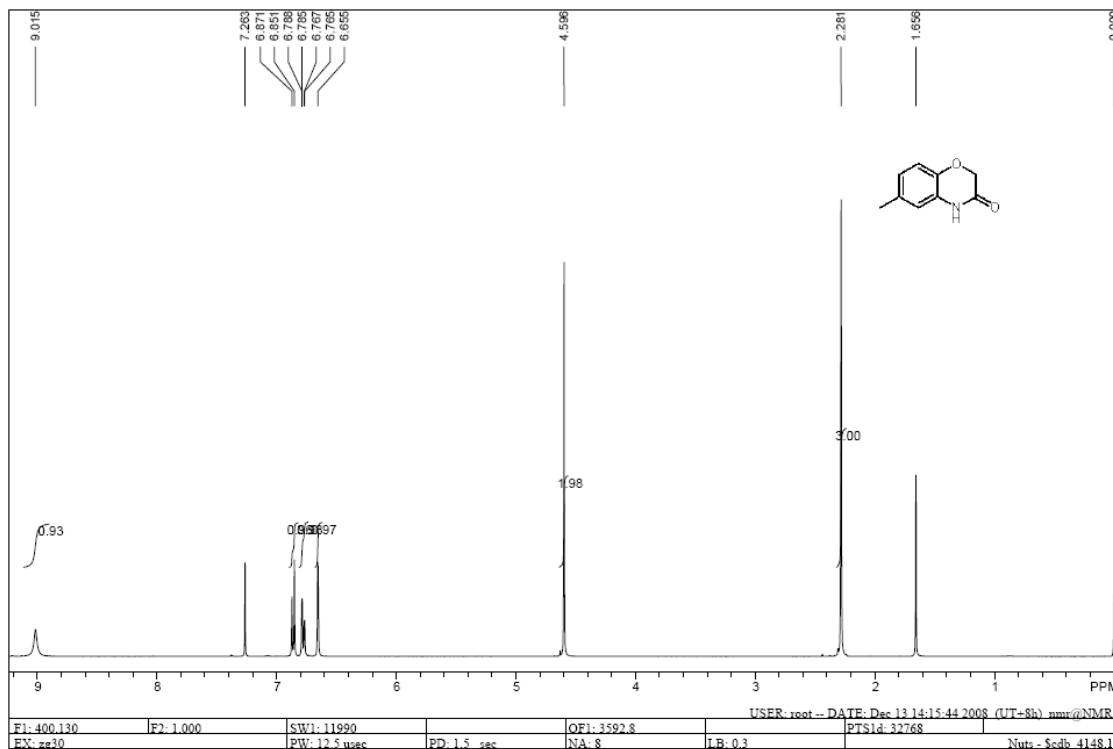

<sup>1</sup>H NMR Spectrum of Compound 3l

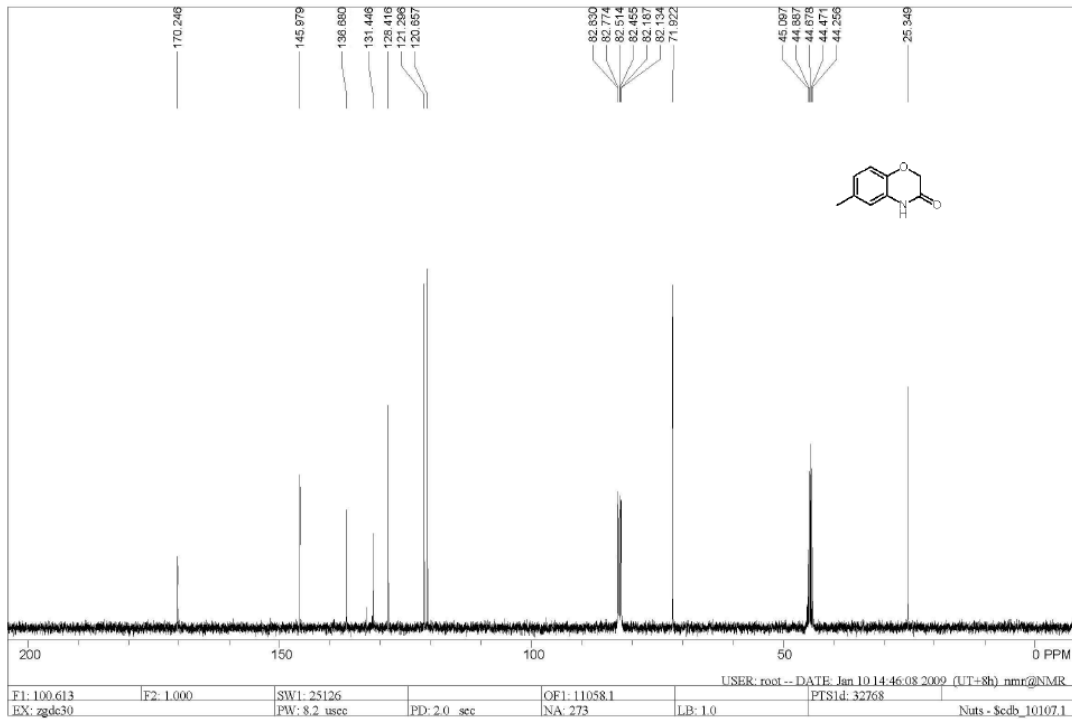

**<sup>13</sup>C NMR Spectrum of Compound 3l**

D:\IOPUS\MEAS\2171

2009-6-15 10:09:38

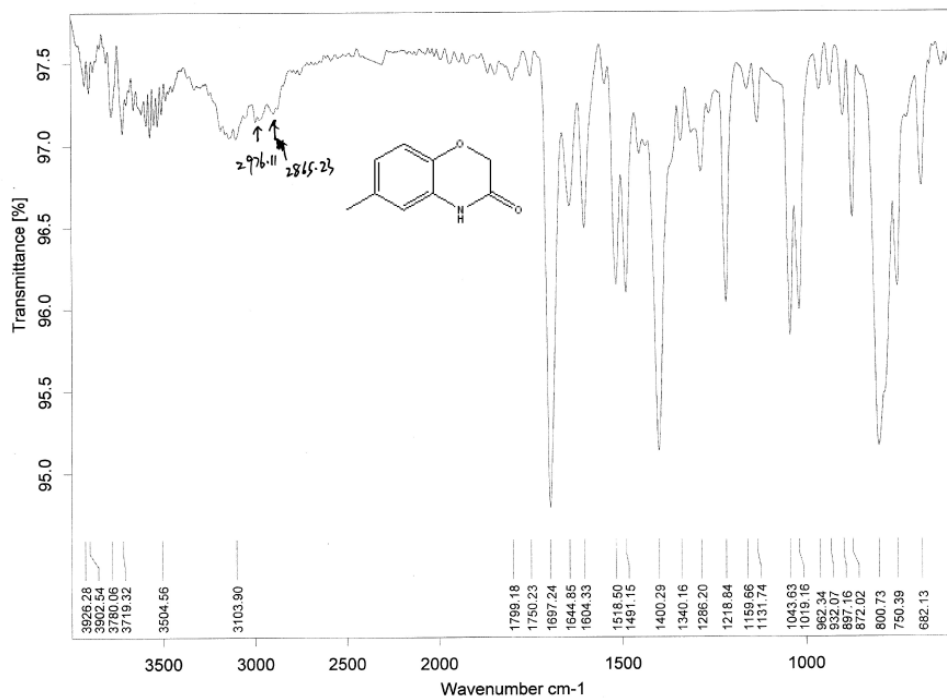

**IR Spectrum of Compound 3l**

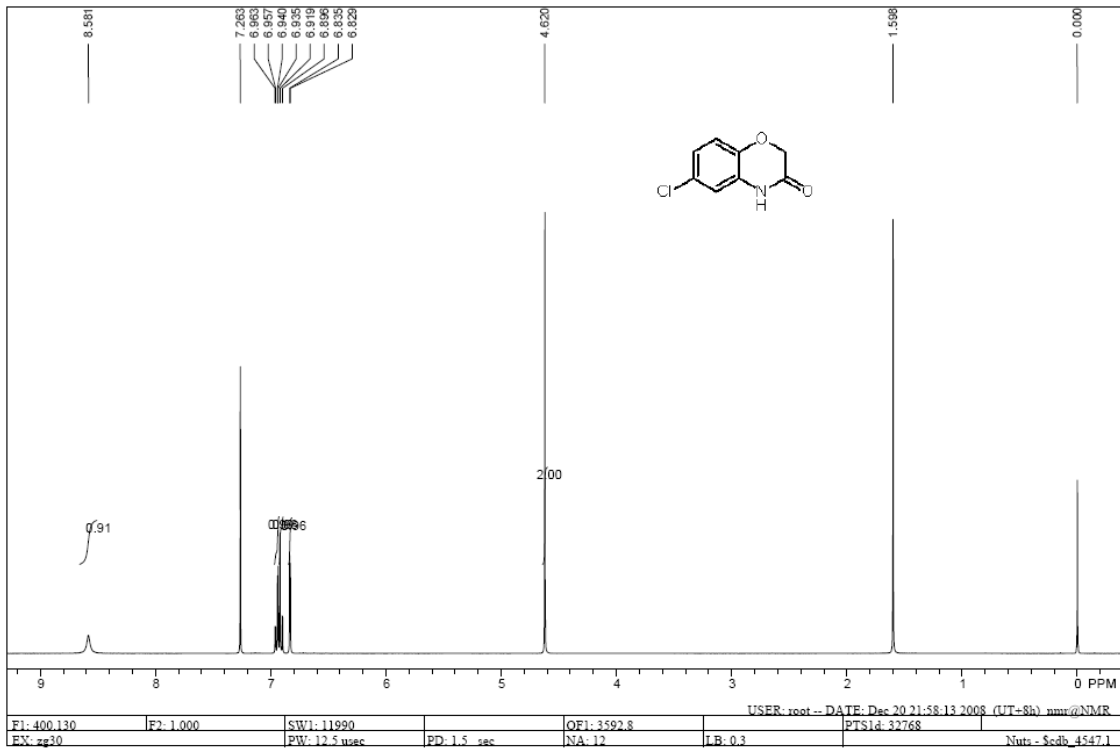

**<sup>1</sup>H NMR Spectrum of Compound 3m**

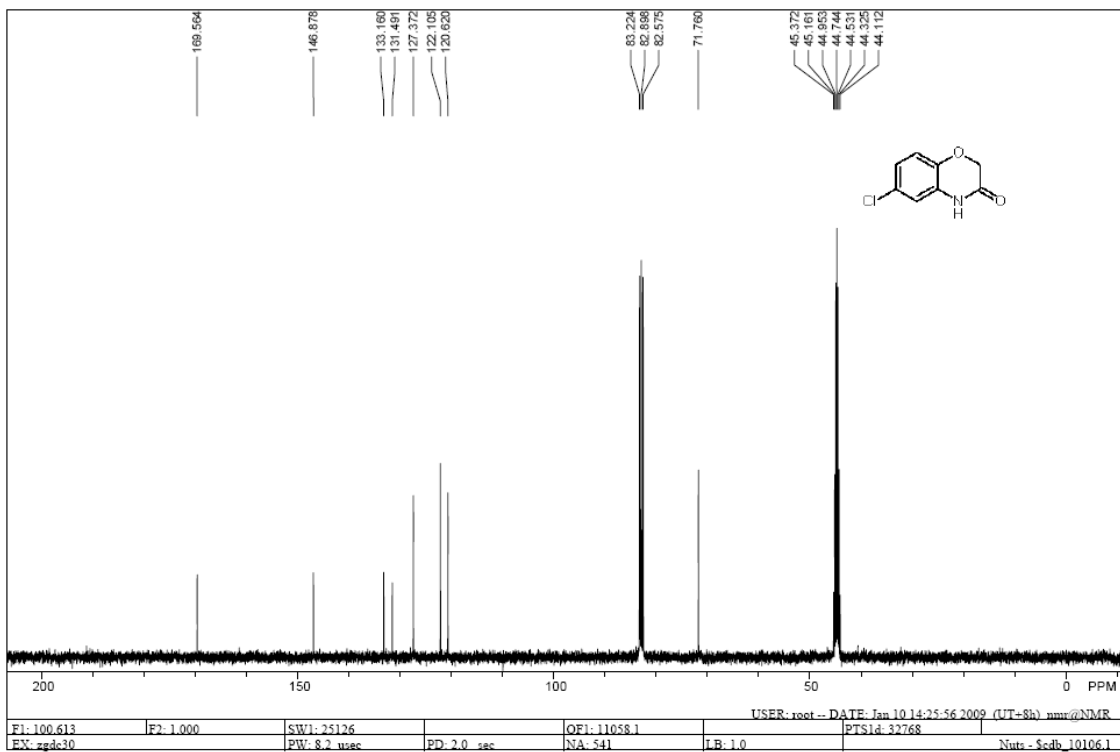

**<sup>13</sup>C NMR Spectrum of Compound 3m**

3m

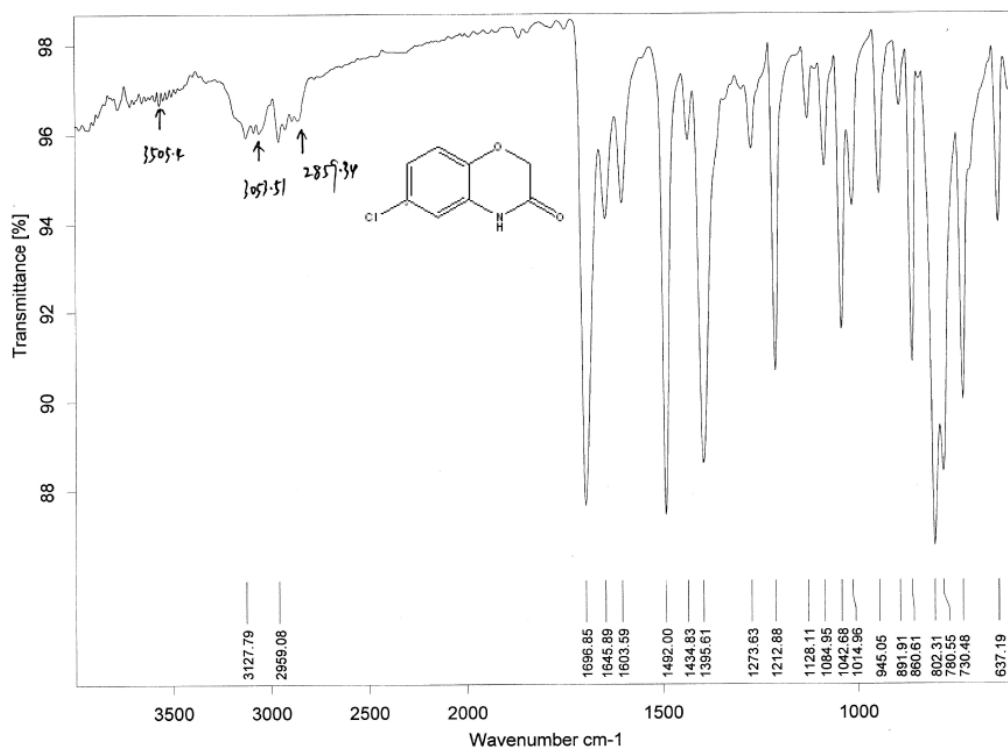

IR Spectrum of Compound 3m

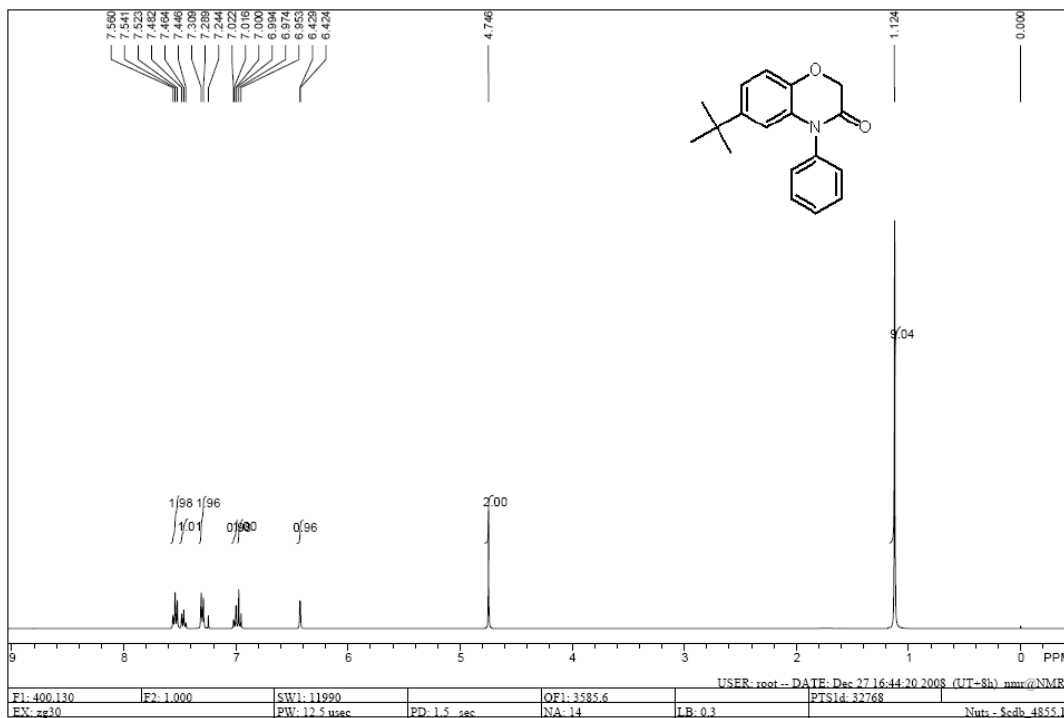

<sup>1</sup>H NMR Spectrum of Compound 3n

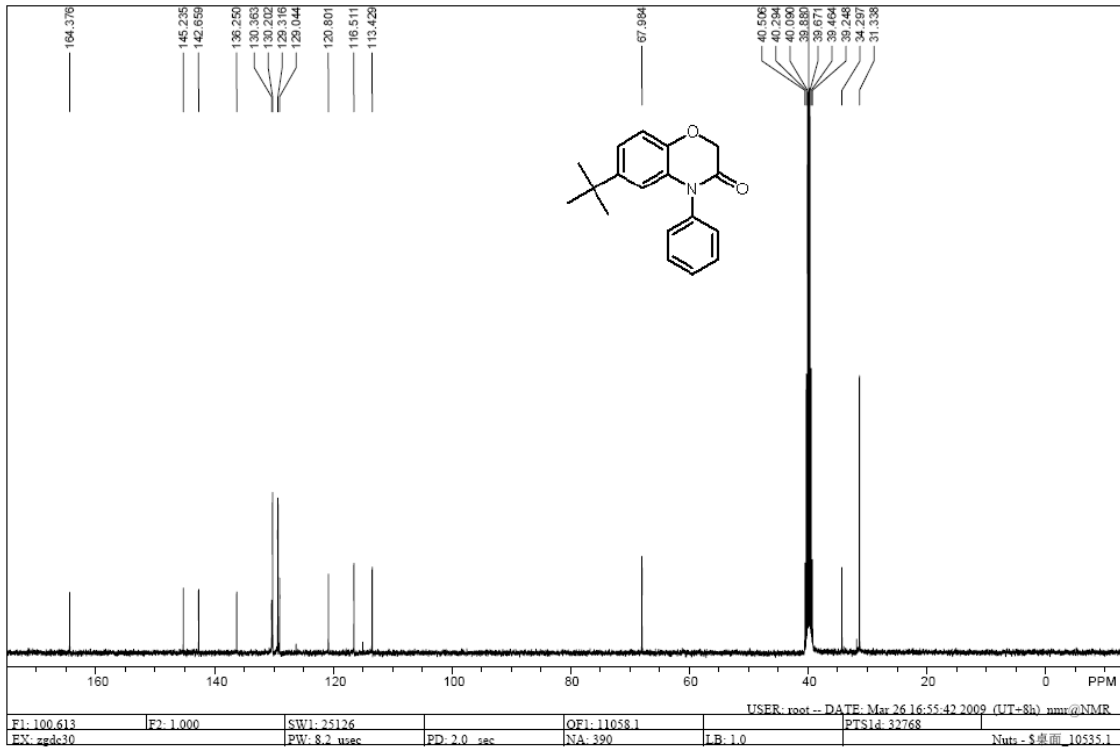

<sup>13</sup>C NMR Spectrum of Compound 3n

D:\OPUS\MEAS\2173 }n

2009-6-15 10:15:54

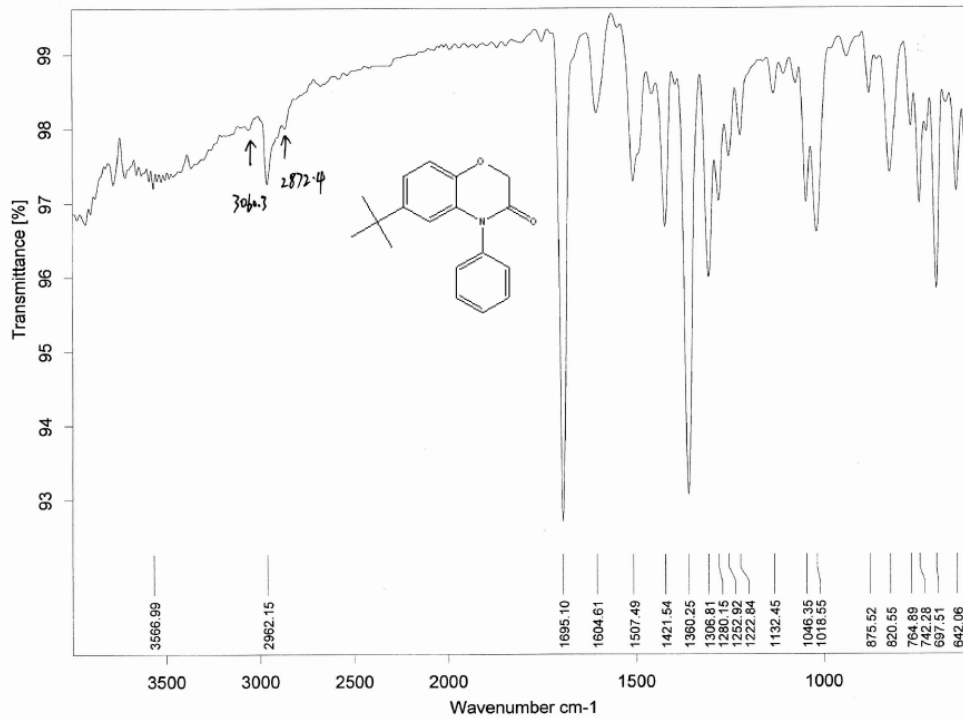

IR Spectrum of Compound 3n

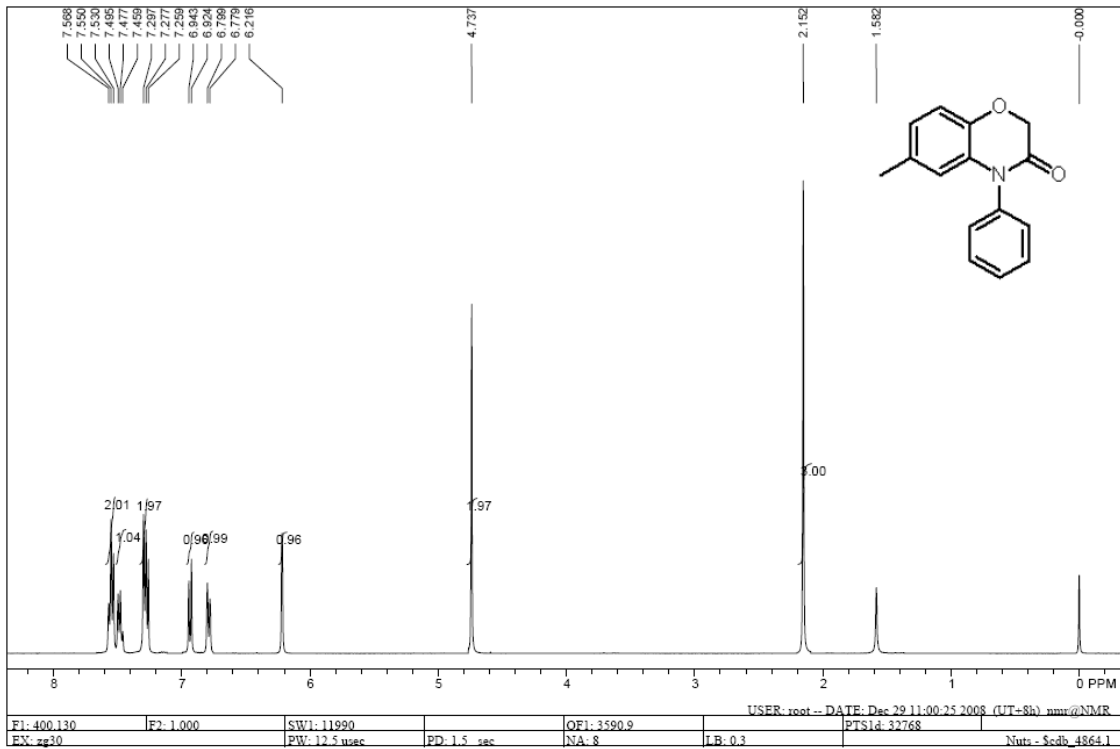

<sup>1</sup>H NMR Spectrum of Compound 30

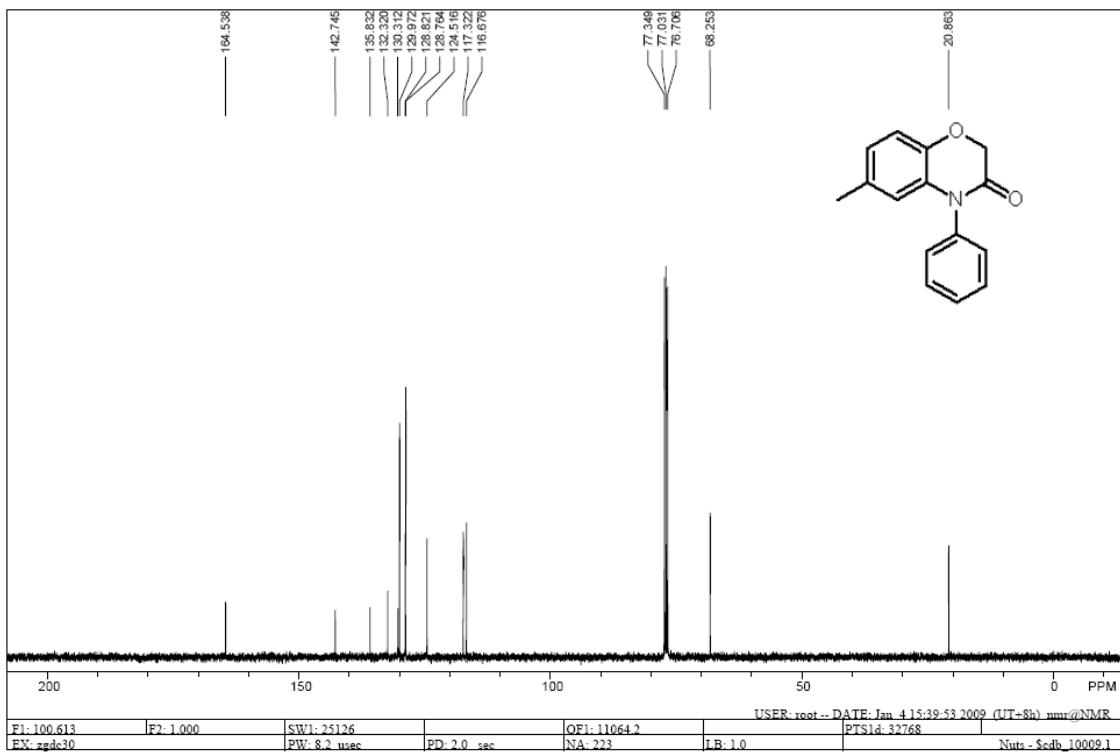

<sup>13</sup>C NMR Spectrum of Compound 30



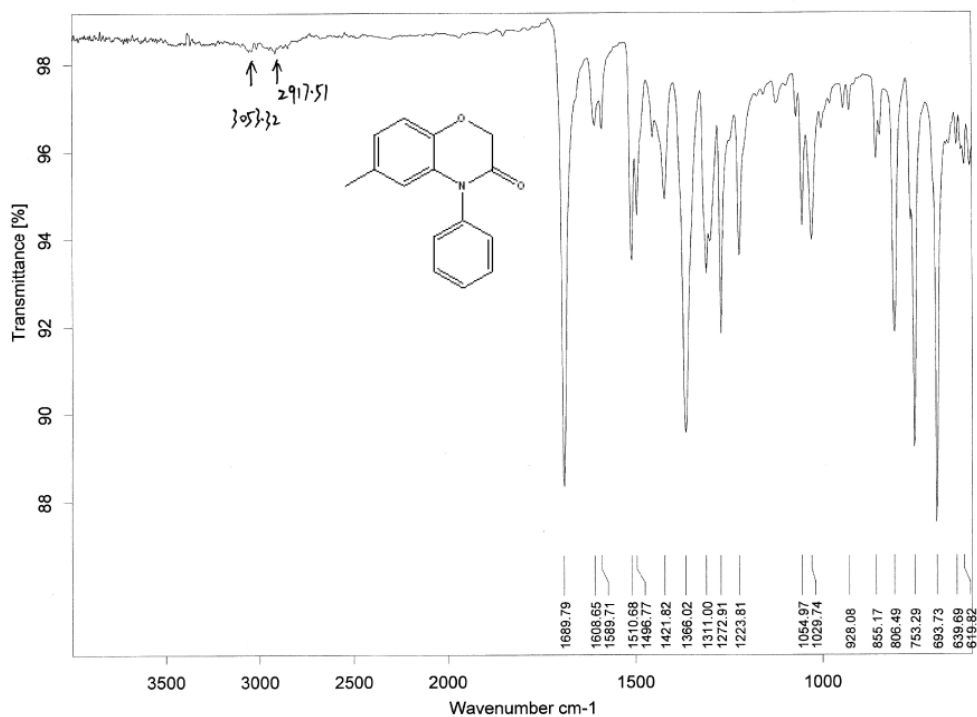

IR Spectrum of Compound 3o

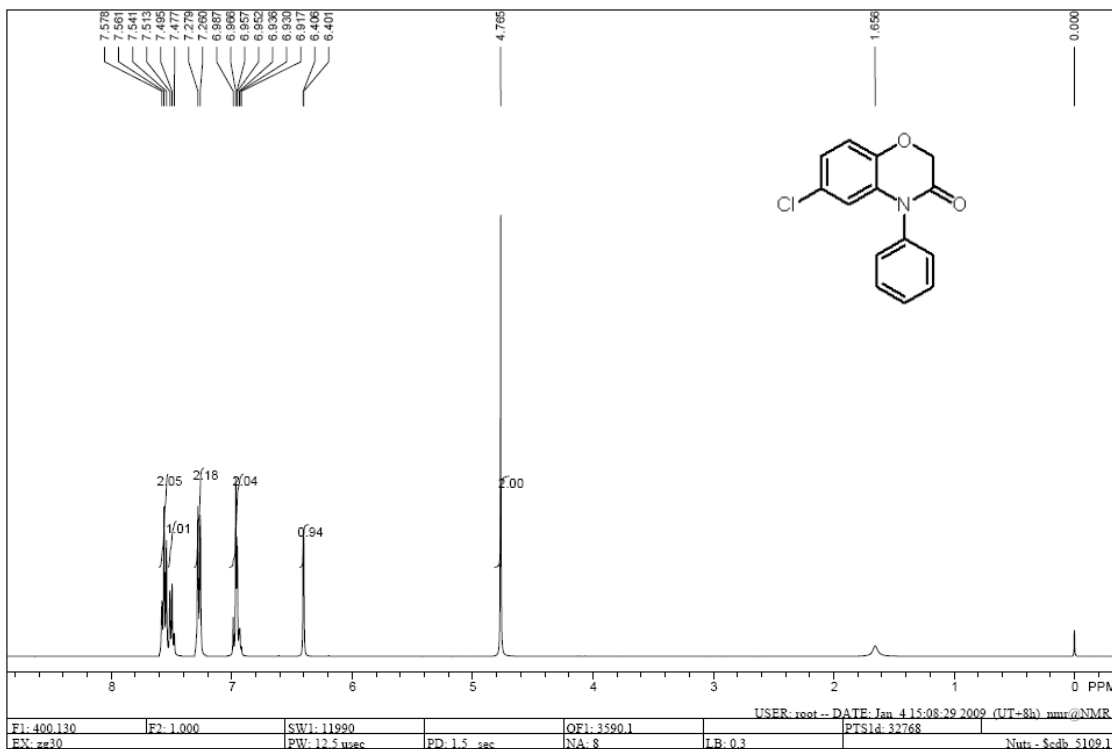<sup>1</sup>H NMR Spectrum of Compound 3p

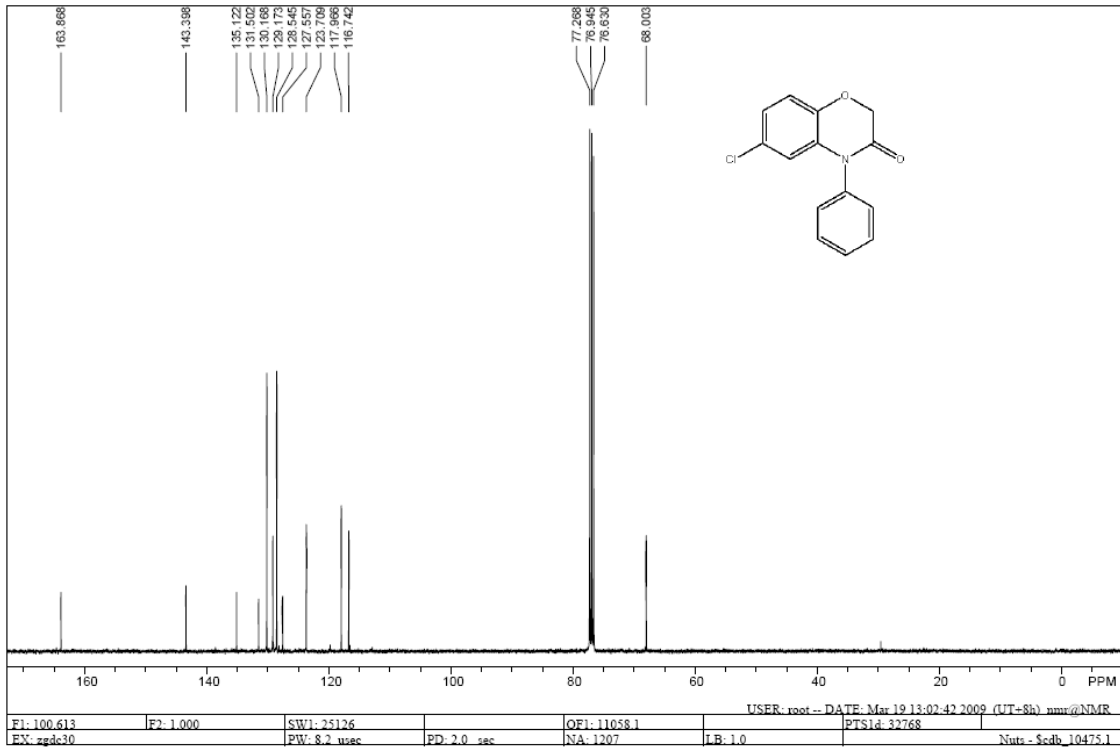

**<sup>13</sup>C NMR Spectrum of Compound 3p**

D:\OPUS\MEAS\2175

2009-6-15 10:21:20

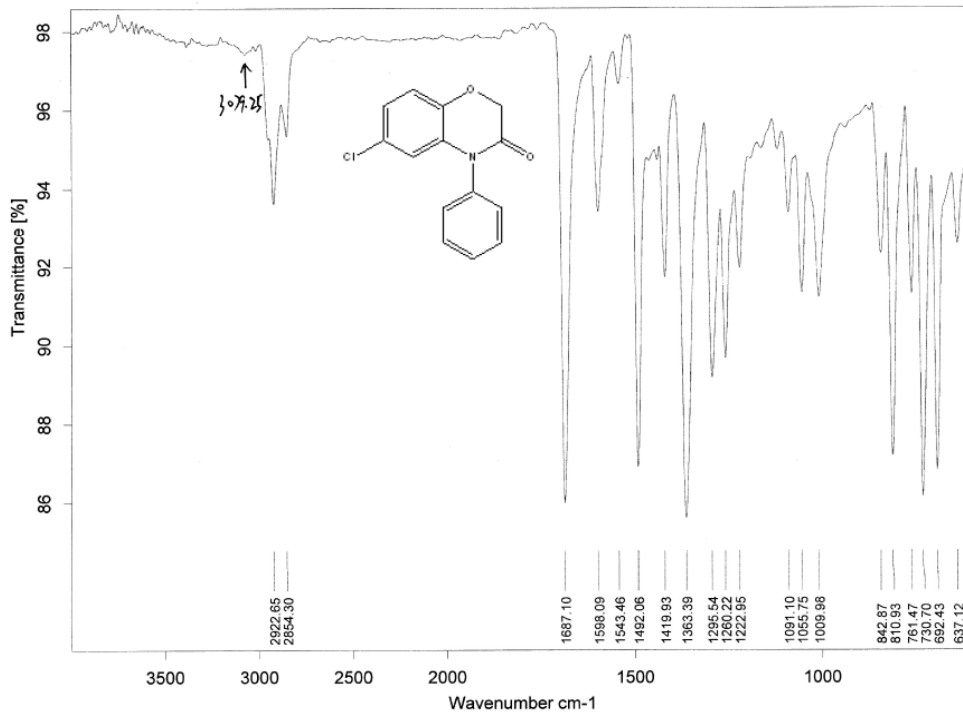

**IR Spectrum of Compound 3p**

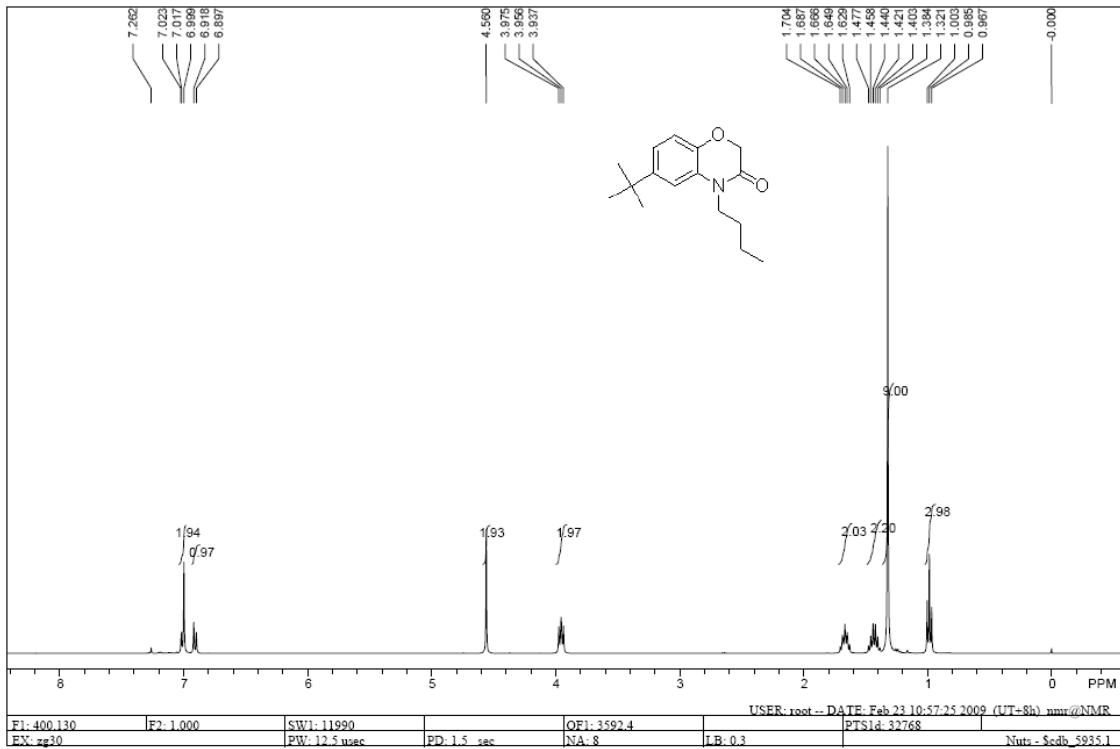

**<sup>1</sup>H NMR Spectrum of Compound 3q**

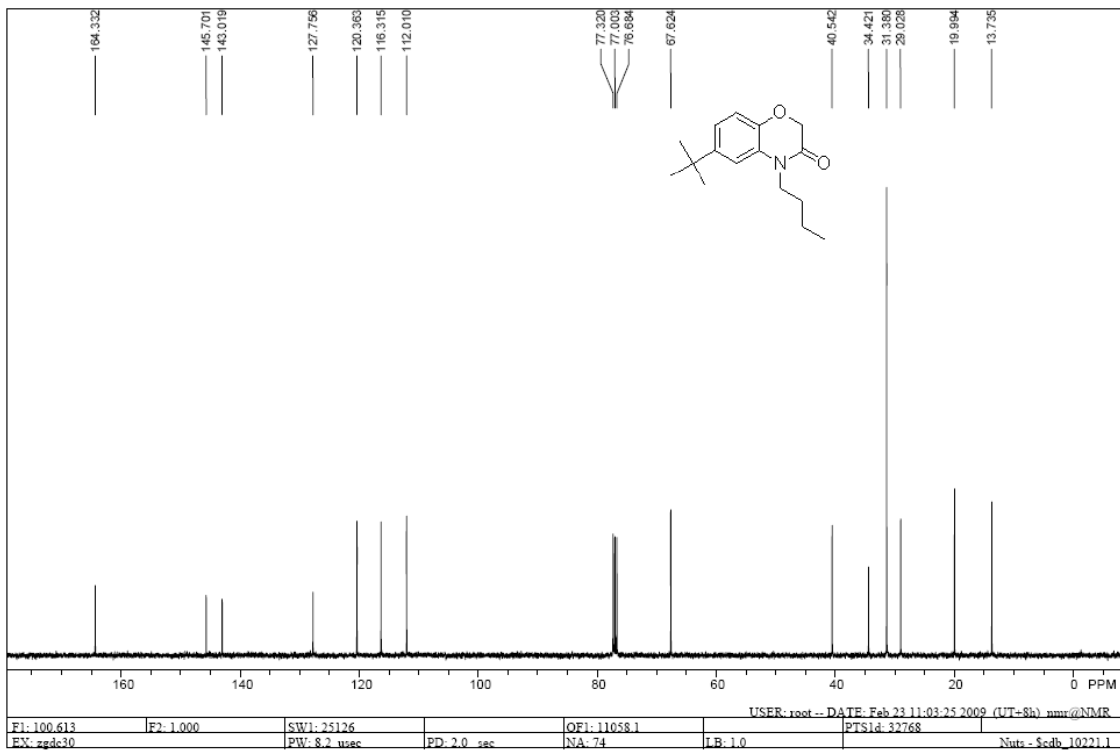

**<sup>13</sup>C NMR Spectrum of Compound 3q**

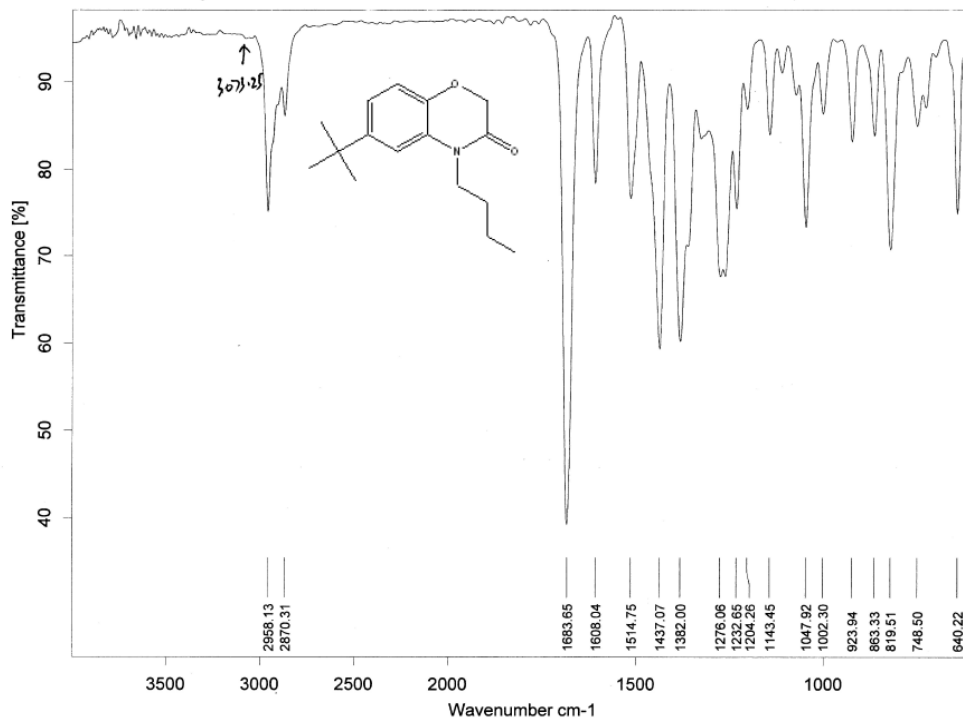

IR Spectrum of Compound 3q

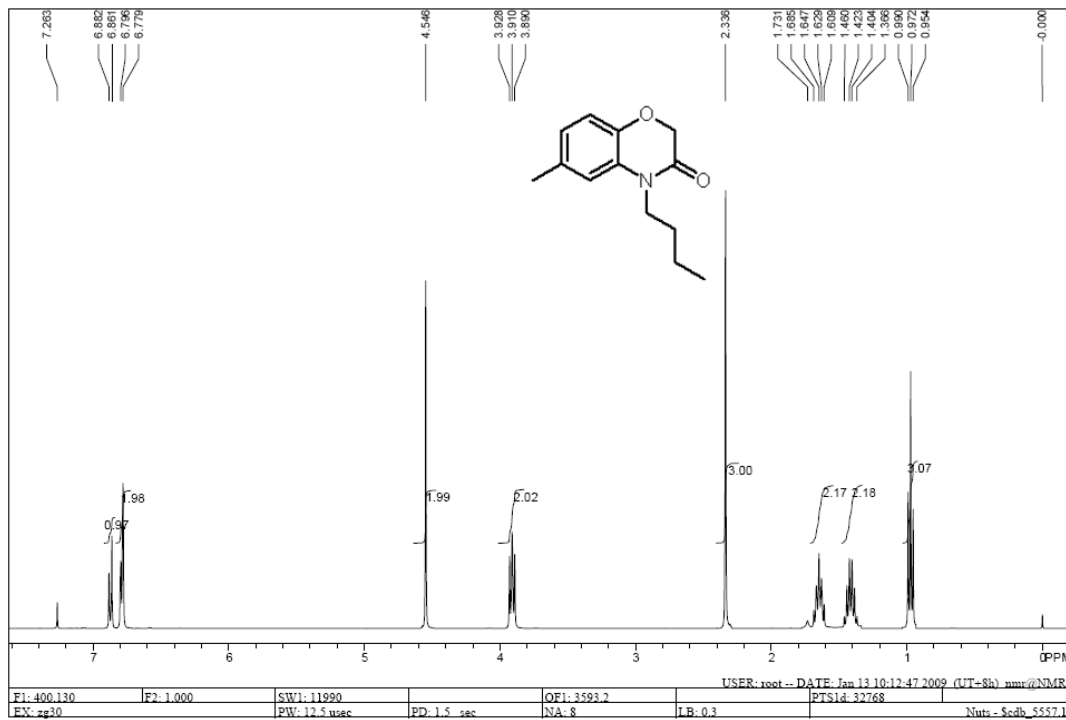<sup>1</sup>H NMR Spectrum of Compound 3r

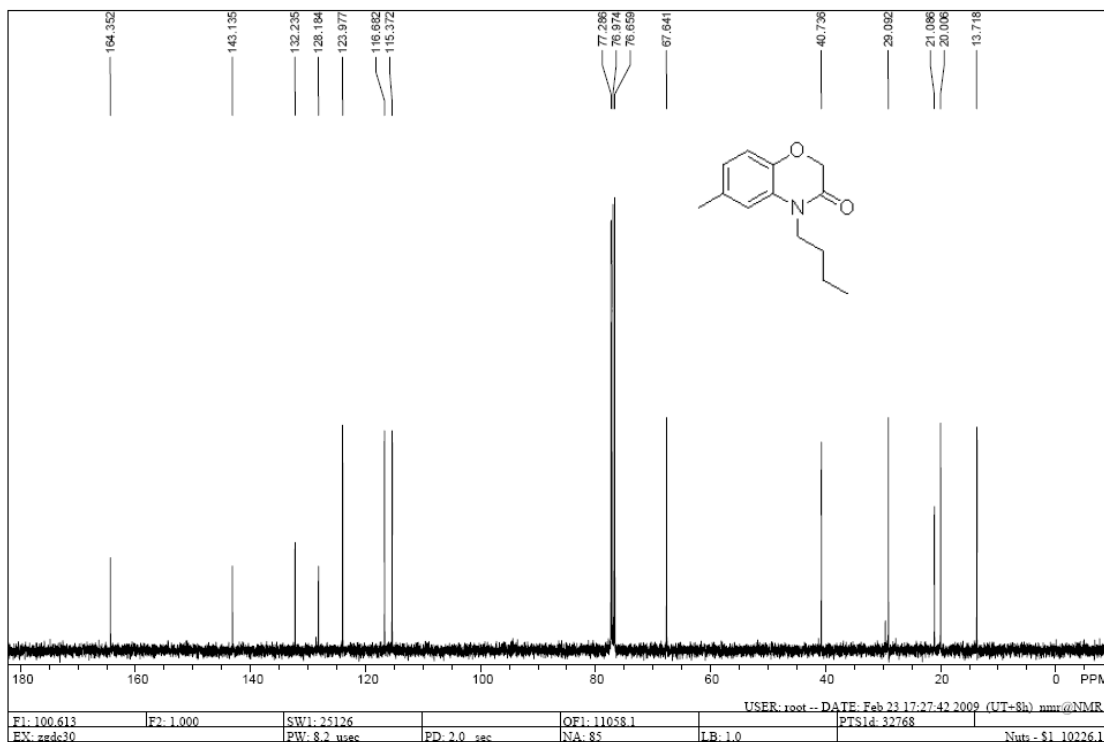

<sup>13</sup>C NMR Spectrum of Compound 3r

D:\OPUSMEAS\2181 }r.

2009-6-15 10:41:39

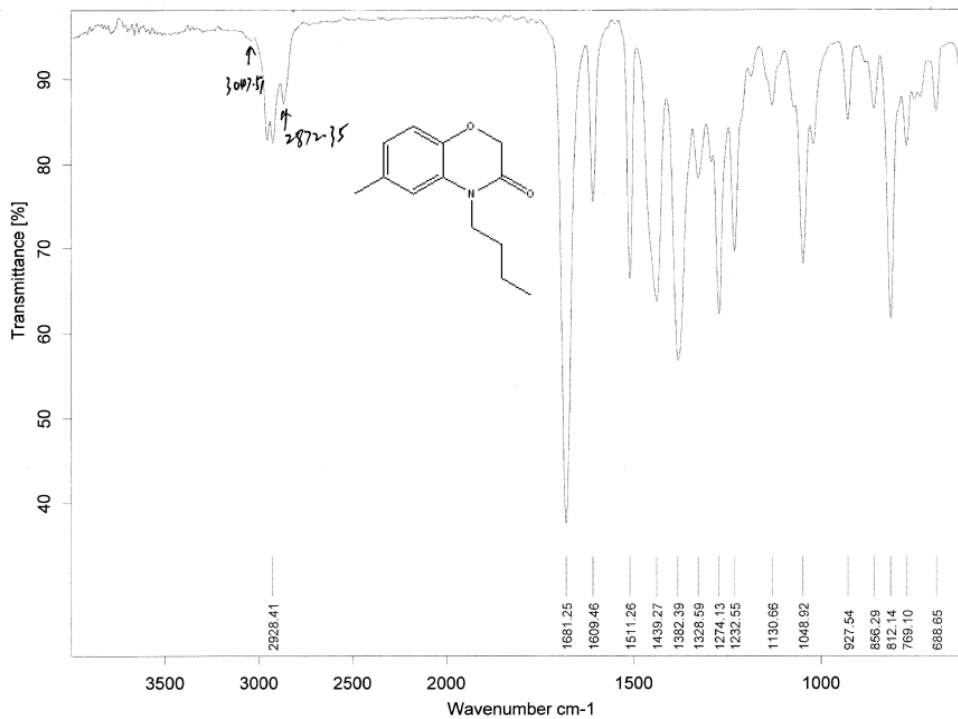

IR Spectrum of Compound 3r

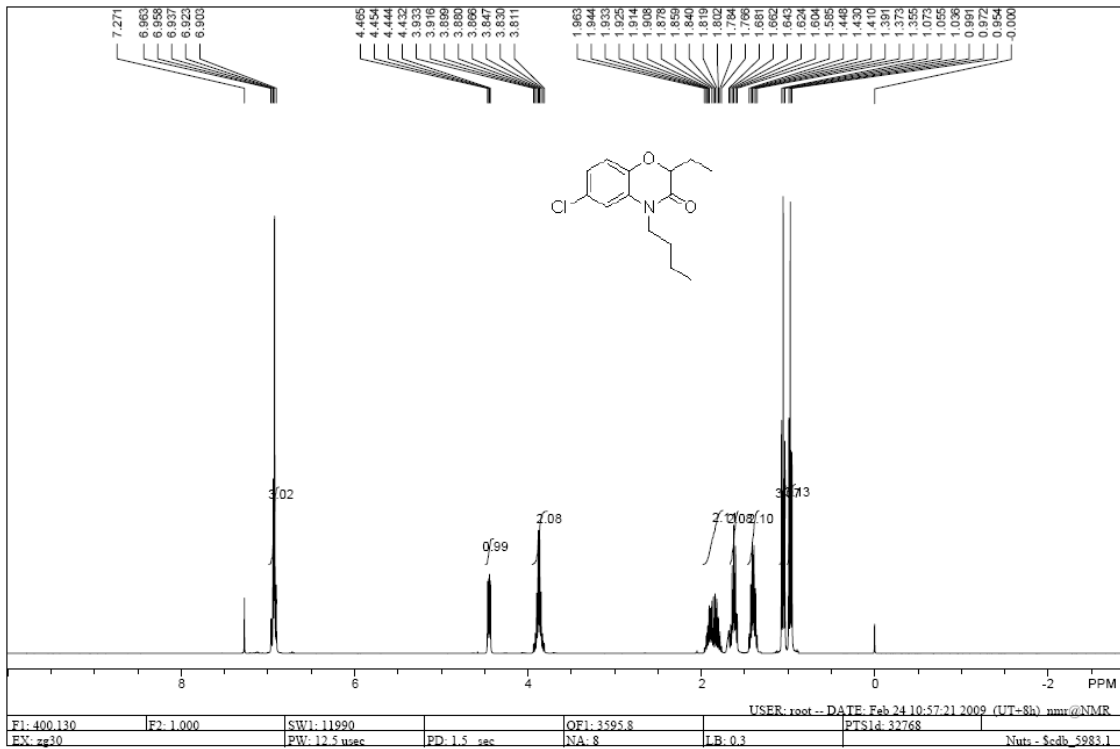

<sup>1</sup>H NMR Spectrum of Compound 3s

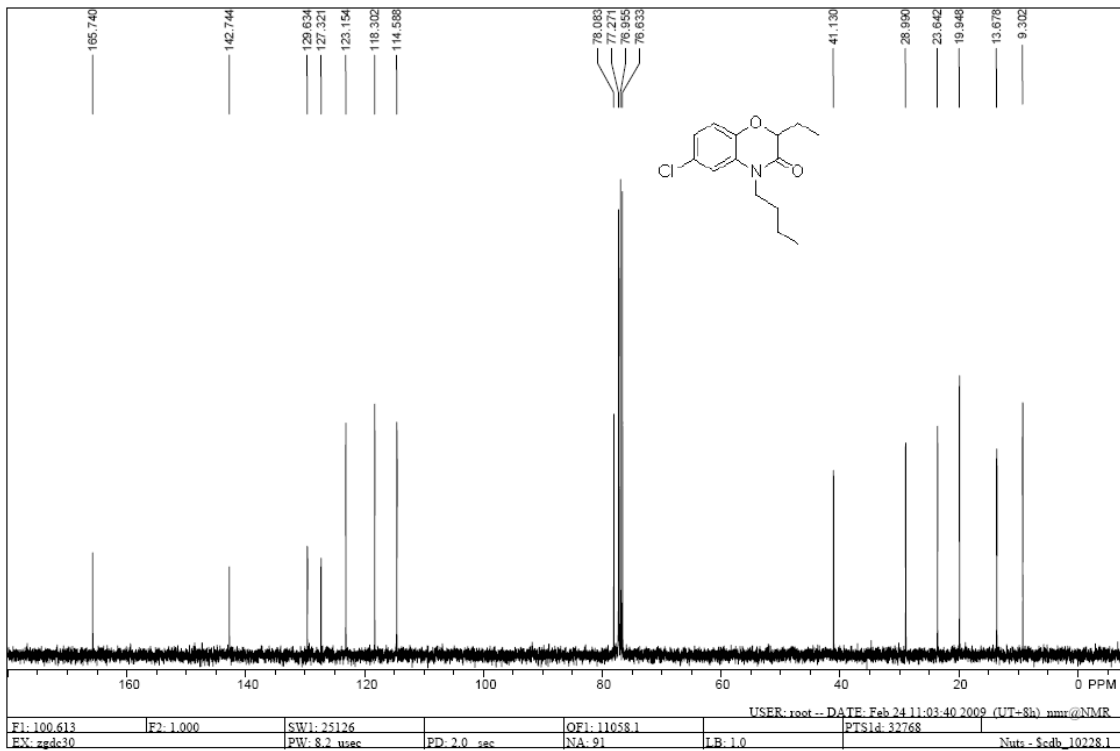

<sup>13</sup>C NMR Spectrum of Compound 3s

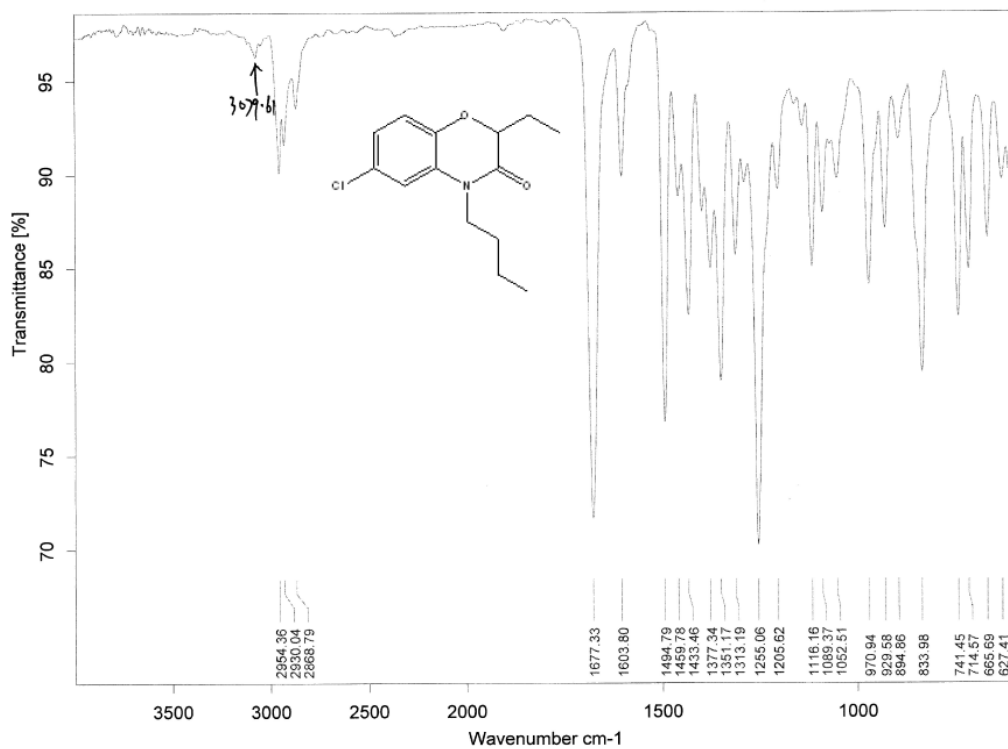

IR Spectrum of Compound 3s

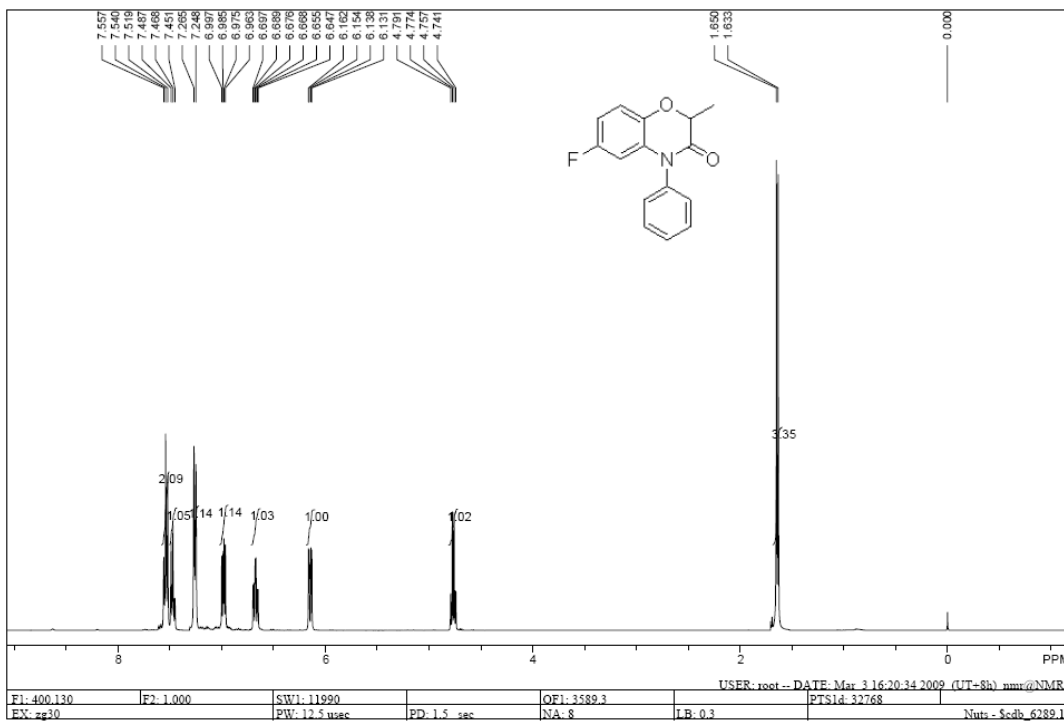

<sup>1</sup>H NMR Spectrum of Compound 3t

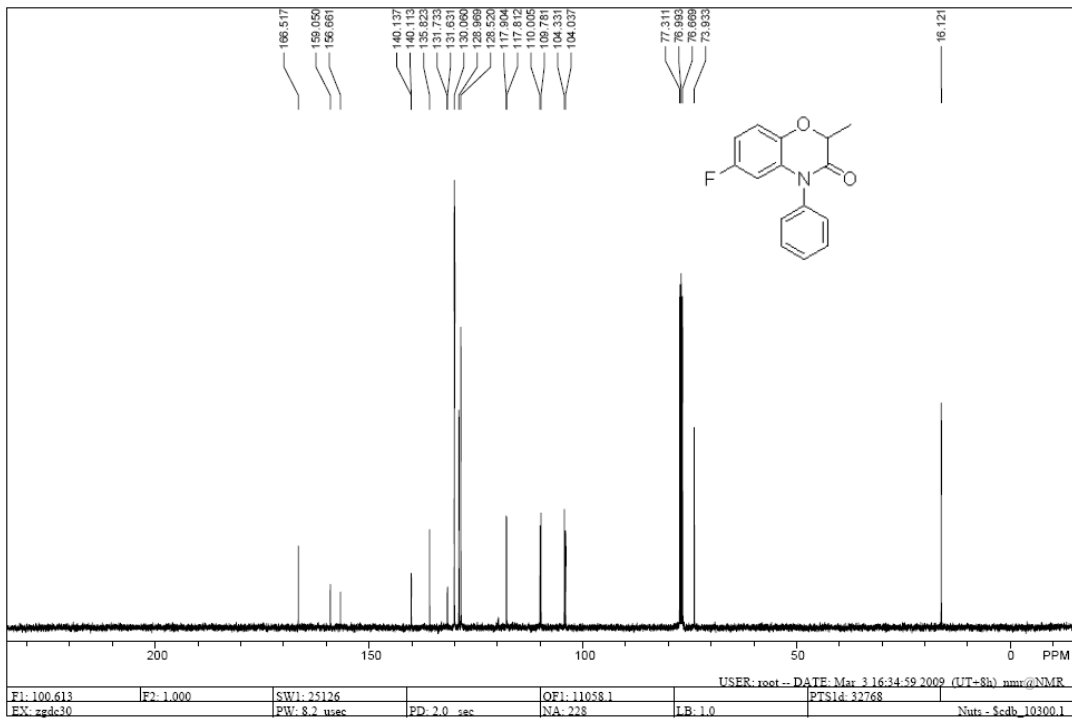

**<sup>13</sup>C NMR Spectrum of Compound 3t**

D:\IOPUS\MEAS\2177 3t

2009-6-15 10:2

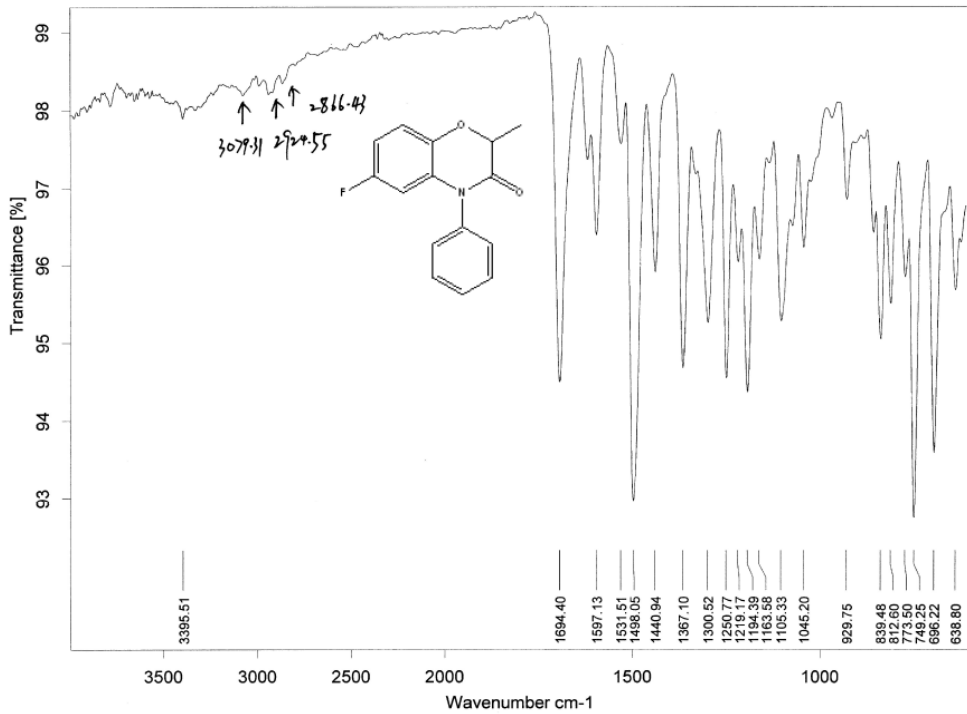

**IR Spectrum of Compound 3t**



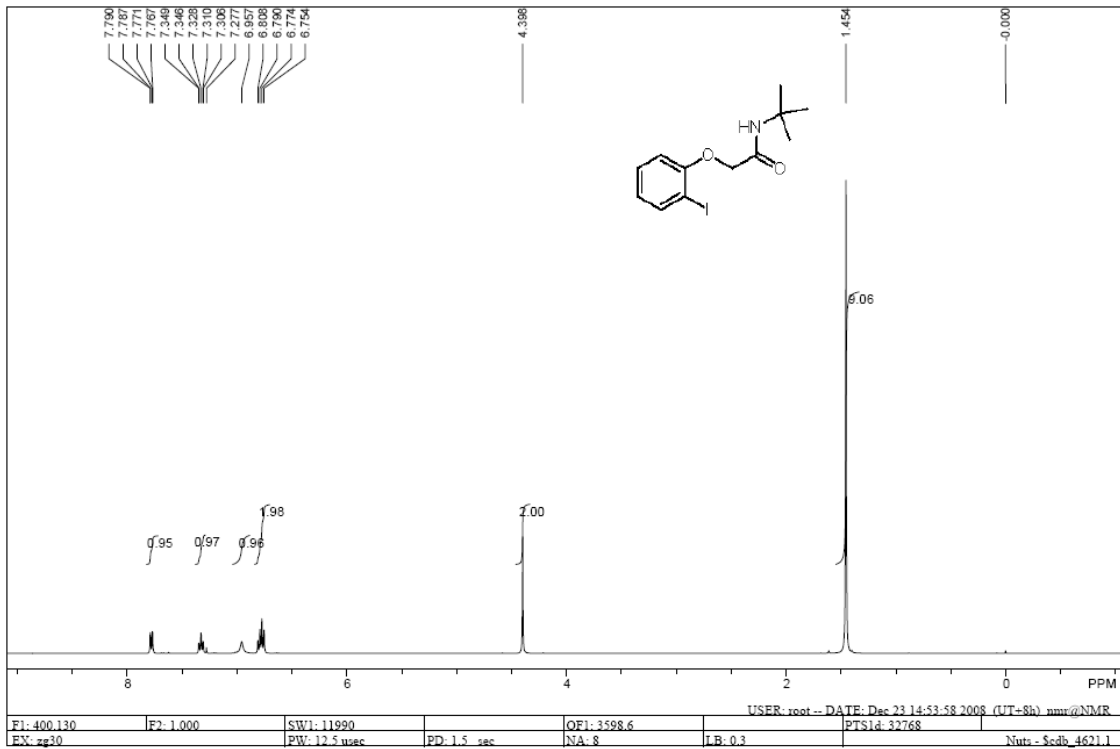

**<sup>1</sup>H NMR Spectrum of Compound 4**

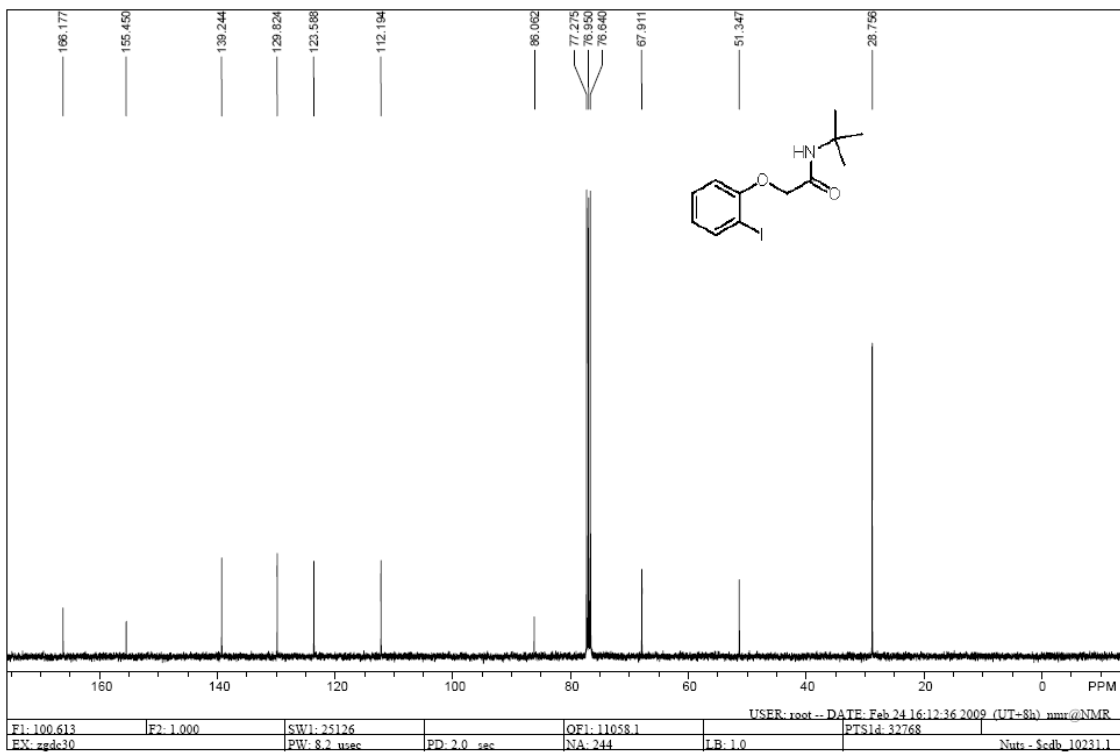

**<sup>13</sup>C NMR Spectrum of Compound 4**

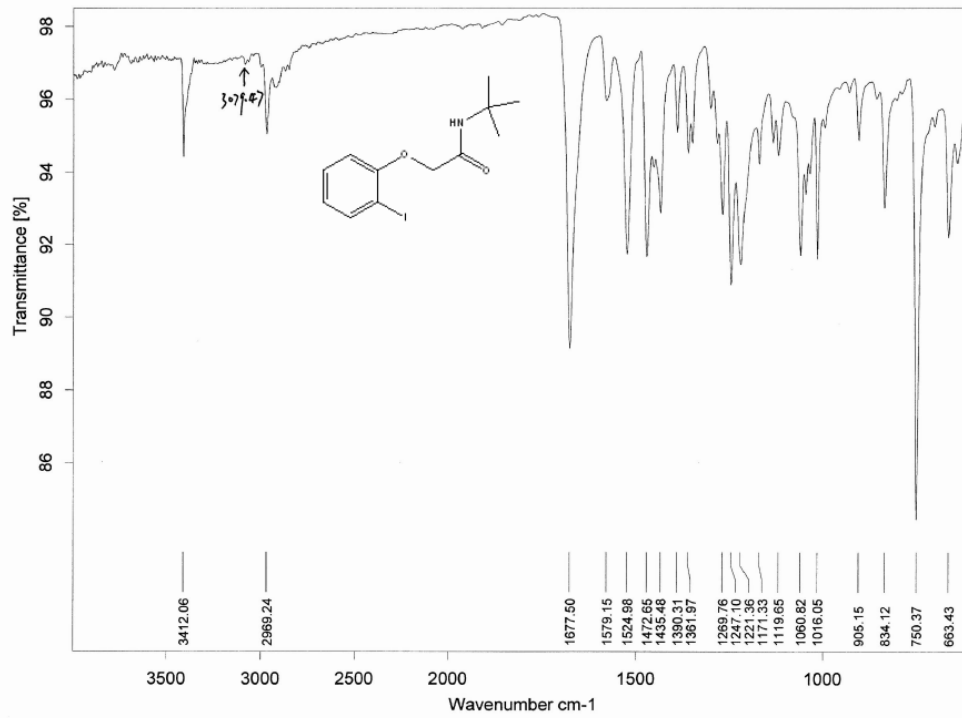

IR Spectrum of Compound 4

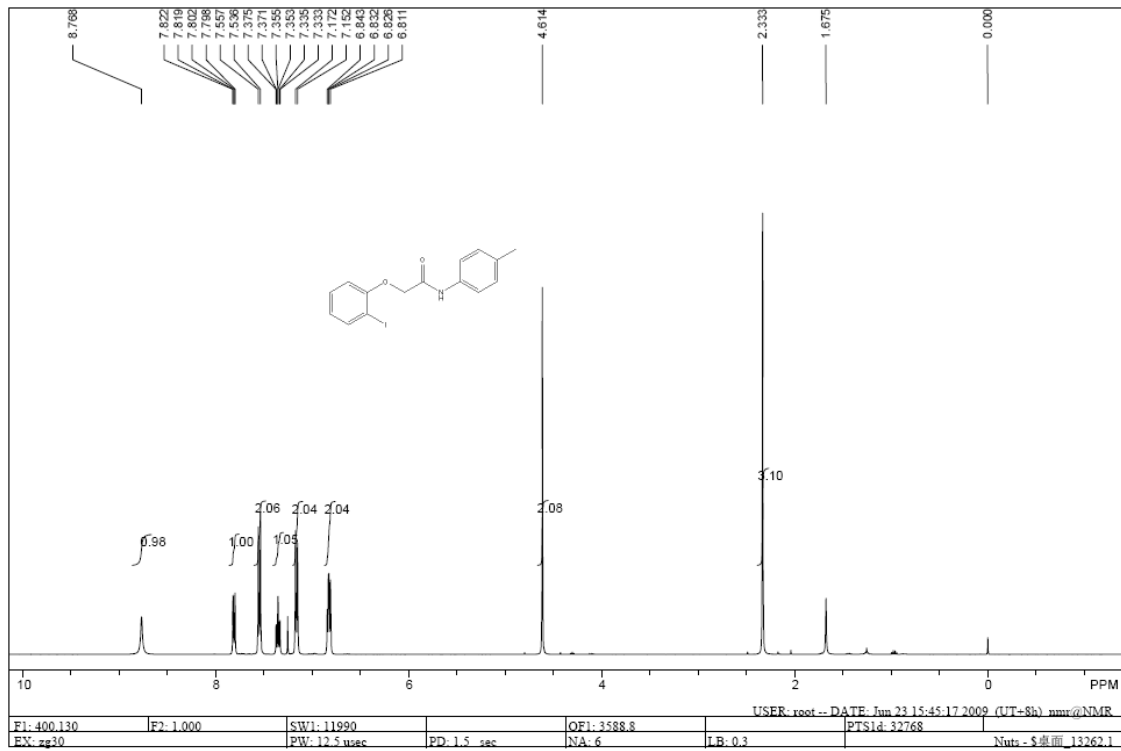<sup>1</sup>H NMR Spectrum of Compound 5

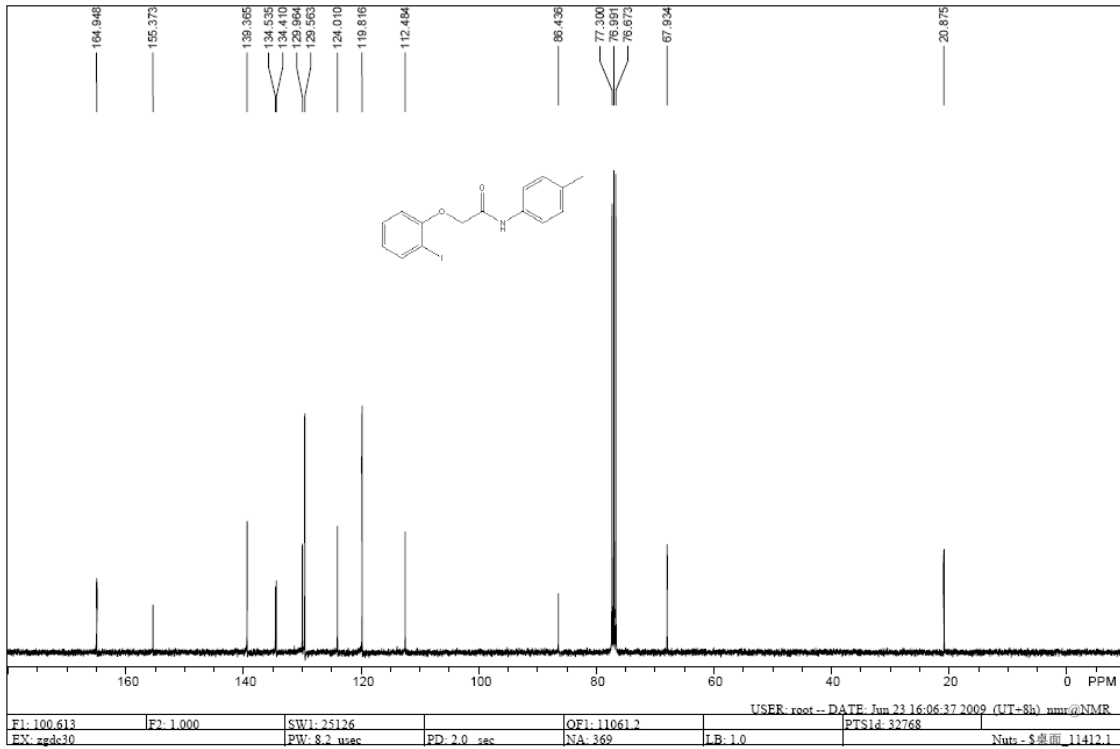

<sup>13</sup>C NMR Spectrum of Compound 5

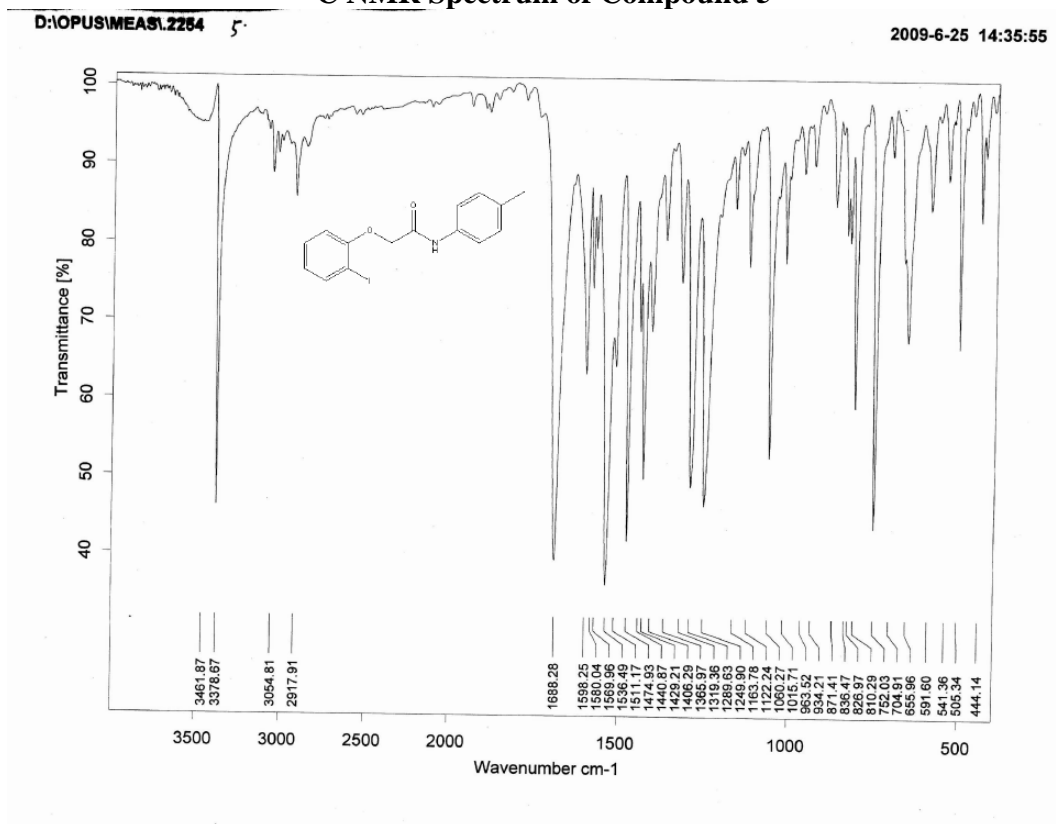

IR Spectrum of Compound 5

**References:**

1 4-Substituted-*o*-iodophenols were synthesized see : (a) K. J. Edgar, S. N. Falling *J. Org. Chem.*, 1990, **55**, 5287; N-substituted 2-halo amides were synthesized see: (b) M. Y. Chang, S. T. Chen, N. C. Chang *Tetrahedron*, 2002, **58**, 3623. (c) P. G. Baraldi, D. Preti, M. A. Tabrizi, F. Fruttarolo, G. Saponaro, S. Baraldi, R. Romagnoli, A. R. Moorman, A. Gessi, K. Varani, P. A. Barea *Bioorganic & Medicinal Chemistry*, 2007, **15**, 2514.
